# Supplementary material for: Tylectomy Safety in Salvage of Eyes with Retinoblastoma
Source: MDPI journal article supplement (doi:10.3390/cancers13225862), 2021-11-22
Supplement: s1 [file s1]

# Safety of Tylectomy in Salvage of Eyes Affected by Retinoblastoma

Raw data, Table S2

| Patient ID | Group | Sex | Age at Dx months | Studied Eye | IIRC | Follow-up Months | Pre-Tyl IVC # | Pre-Tyl IAC # | Dx to Tyl months | Post-Tyl IVC # | Post-Tyl Ivtc # | Post-Tyl Recurrence | Enu | Dx to Enu | pTNM | OS  | DDS | Dx to Death months |
|------------|-------|-----|------------------|-------------|------|------------------|---------------|---------------|------------------|----------------|-----------------|---------------------|-----|-----------|------|-----|-----|--------------------|
| 1          | 2     | M   | 15               | OS          | E    | 17               | 1             | 0             |                  |                |                 |                     | No  |           |      | Neg | Neg | 17                 |
| 2          | 2     | M   | 12               | OS          | E    | 59               | 4             | 0             |                  |                |                 |                     | Yes | 25        | pT4  | Neg | Neg | 59                 |
| 3          | 3     | F   | 3                | OD          | E    | 81               | 0             | 0             |                  |                |                 |                     | Yes | 21        | pT1  | Pos | Pos |                    |
| 4          | 2     | M   | 5                | OD          | E    | 31               | 4             | 0             |                  |                |                 |                     | No  |           |      | Neg | Neg | 31                 |
| 5          | 2     | M   | 16               | OS          | E    | 58               | 4             | 2             |                  |                |                 |                     | Yes | 40        | pT4  | Neg | Neg | 58                 |
| 6          | 1     | F   | 69               | OD          | E    | 66               | 0             | 0             | 0                | 3              | 0               | Yes                 | Yes | 61        | pT4  | Pos | Pos |                    |
| 7          | 1     | M   | 34               | OS          | E    | 5                | 0             | 0             | 0                | 0              | 0               | Yes                 | No  |           |      | Neg | Neg | 5                  |
| 8          | 1     | M   | 8                | OD          | E    | 64               | 6             | 0             | 8                | 0              | 0               | No                  | No  |           |      | Pos | Pos |                    |
| 9          | 1     | F   | 17               | OS          | E    | 70               | 3             | 0             | 3                | 0              | 0               | Yes                 | Yes | 25        | pT1  | Pos | Pos |                    |
| 10         | 2     | F   | 11               | OD          | E    | 3                | 3             | 4             |                  |                |                 |                     | No  |           |      | Pos | Pos |                    |
| 11         | 2     | M   | 11               | OD          | E    | 30               | 2             | 1             |                  |                |                 |                     | No  |           |      | Pos | Pos |                    |
| 12         | 1     | F   | 25               | OS          | D    | 103              | 10            | 0             | 16               | 0              | 1               | No                  | No  |           |      | Pos | Pos |                    |
| 13         | 1     | M   | 23               | OS          | D    | 102              | 9             | 0             | 12               | 0              | 4               | No                  | No  |           |      | Pos | Pos |                    |
| 14         | 1     | M   | 22               | OS          | D    | 93               | 9             | 0             | 11               | 0              | 2               | Yes                 | Yes | 16        | pt1  | Pos | Pos |                    |
| 15         | 2     | M   | 15               | OD          | E    | 100              | 4             | 0             |                  |                |                 |                     | Yes | 4         | pT1  | Pos | Pos |                    |
| 16         | 1     | M   | 29               | OS          | D    | 18               | 6             | 0             | 8                | 0              | 0               | Yes                 | Yes | 14        | pT3d | Neg | Neg | 18                 |
| 17         | 1     | M   | 7                | OS          | D    | 99               | 5             | 0             | 10               | 0              | 3               | No                  | No  |           |      | Pos | Pos |                    |
| 18         | 2     | M   | 6                | OS          | D    | 86               | 0             | 4             |                  |                |                 |                     | No  |           |      | Pos | Pos |                    |
| 19         | 1     | M   | 19               | OS          | D    | 33               | 4             | 0             | 5                | 0              | 0               | No                  | No  |           |      | Pos | Pos |                    |
| 20         | 1     | M   | 20               | OS          | D    | 81               | 4             | 0             | 4                | 1              | 1               | No                  | No  |           |      | Pos | Pos |                    |
| 21         | 1     | M   | 38               | OS          | D    | 84               | 5             | 0             | 17               | 0              | 0               | No                  | No  |           |      | Pos | Pos |                    |
| 22         | 2     | M   | 12               | OD          | E    | 5                | 0             | 1             |                  |                |                 |                     | No  |           |      | Pos | Pos |                    |
| 23         | 2     | F   | 26               | OD          | E    | 19               | 3             | 0             |                  |                |                 |                     | Yes | 4         | pT3b | Neg | Neg | 19                 |
| 24         | 2     | F   | 12               | OD          | E    | 77               | 2             | 0             |                  |                |                 |                     | Yes | 2         | pT1  | Pos | Pos |                    |
| 25         | 2     | M   | 11               | OD          | E    | 88               | 4             | 1             |                  |                |                 |                     | No  |           |      | Pos | Pos |                    |
| 26         | 2     | F   | 4                | OD          | E    | 2                | 2             | 0             |                  |                |                 |                     | No  |           |      | Pos | Pos |                    |
| 27         | 1     | M   | 15               | OS          | D    | 76               | 8             | 0             | 5                | 0              | 0               | No                  | No  |           |      | Pos | Pos |                    |
| 28         | 2     | F   | 6                | OD          | E    | 4                | 3             | 1             |                  |                |                 |                     | No  |           |      | Pos | Pos |                    |
| 29         | 2     | M   | 9                | OD          | E    | 2                | 0             | 1             |                  |                |                 |                     | No  |           |      | Pos | Pos |                    |
| 30         | 2     | M   | 35               | OD          | E    | 3                | 1             | 2             |                  |                |                 |                     | No  |           |      | Pos | Pos |                    |
| 31         | 1     | F   | 27               | OS          | D    | 53               | 3             | 0             | 6                | 1              | 0               | No                  | No  |           |      | Pos | Pos |                    |
| 32         | 2     | F   | 22               | OD          | E    | 58               | 3             | 0             |                  |                |                 |                     | Yes | 4         | pT1  | Pos | Pos |                    |
| 33         | 2     | F   | 9                | OD          | E    | 6                | 4             | 2             |                  |                |                 |                     | No  |           |      | Pos | Pos |                    |
| 34         | 1     | M   | 2                | OD          | E    | 28               | 2             | 0             | 3                | 1              | 0               | No                  | No  |           |      | Neg | Pos | 28                 |
| 35         | 1     | M   | 24               | OS          | C    | 82               | 4             | 0             | 10               | 0              | 3               | No                  | No  |           |      | Pos | Pos |                    |
| 36         | 2     | F   | 30               | OD          | E    | 83               | 1             | 0             |                  |                |                 |                     | Yes | 1         | pT3d | Pos | Pos |                    |
| 37         | 1     | M   | 23               | OD          | E    | 69               | 3             | 0             | 3                | 2              | 2               | No                  | No  |           |      | Pos | Pos |                    |
| 38         | 1     | F   | 35               | OD          | E    | 22               | 6             | 0             | 5                | 0              | 0               | Yes                 | Yes | 10        | pT1  | Neg | Neg | 22                 |
| 39         | 1     | M   | 6                | OD          | E    | 66               | 2             | 0             | 2                | 0              | 2               | No                  | No  |           |      | Pos | Pos |                    |
| 40         | 1     | M   | 19               | OS          | C    | 64               | 3             | 0             | 3                | 0              | 0               | No                  | No  |           |      | Pos | Pos |                    |
| 41         | 1     | F   | 4                | OS          | C    | 58               | 2             | 0             | 3                | 0              | 0               | No                  | No  |           |      | Pos | Pos |                    |
| 42         | 2     | M   | 2                | OD          | E    | 78               | 2             | 1             |                  |                |                 |                     | Yes | 11        | pT1  | Pos | Pos |                    |
| 43         | 2     | M   | 14               | OS          | B    | 71               | 4             | 3             |                  |                |                 |                     | No  |           |      | Pos | Pos |                    |
| 44         | 2     | F   | 6                | OD          | E    | 78               | 2             | 0             |                  |                |                 |                     | Yes | 14        | pT2b | Pos | Pos |                    |
| 45         | 1     | M   | 42               | OD          | E    | 74               | 6             | 0             | 8                | 0              | 0               | No                  | No  |           |      | Pos | Pos |                    |
| 46         | 2     | M   | 18               | OS          | B    | 76               | 1             | 0             |                  |                |                 |                     | No  |           |      | Pos | Pos |                    |
| 47         | 2     | F   | 11               | OD          | E    | 8                | 2             | 0             |                  |                |                 |                     | Yes | 2         | pT1  | Neg | Neg | 8                  |
| 48         | 2     | M   | 15               | OD          | E    | 82               | 3             | 0             |                  |                |                 |                     | Yes | 3         | pT1  | Pos | Pos |                    |
| 49         | 2     | M   | 13               | OD          | E    | 67               | 4             | 0             |                  |                |                 |                     | Yes | 4         | pT1  | Pos | Pos |                    |
| 50         | 2     | M   | 3                | OS          | B    | 58               | 0             | 0             |                  |                |                 |                     | No  | 0         | pT3d | Pos | Pos |                    |
| 51         | 1     | M   | 4                | OD          | E    | 64               | 2             | 0             | 2                | 0              | 2               | No                  | No  |           |      | Pos | Pos |                    |
| 52         | 1     | M   | 28               | OS          | B    | 61               | 1             | 0             | 1                | 0              | 0               | No                  | No  |           |      | Pos | Pos |                    |
| 53         | 2     | M   | 10               | OD          | E    | 61               | 2             | 0             |                  |                |                 |                     | Yes | 4         | pT3b | Pos | Pos |                    |
| 54         | 2     | M   | 4                | OD          | E    | 55               | 3             | 0             |                  |                |                 |                     | Yes | 13        | N/A  | Pos | Pos |                    |
| 55         | 2     | M   | 8                | OD          | E    | 66               | 2             | 3             |                  |                |                 |                     | Yes | 10        | pT1  | Pos | Pos |                    |
| 56         | 2     | M   | 5                | OS          | B    | 55               | 5             | 0             |                  |                |                 |                     | No  |           |      | Pos | Pos |                    |
| 57         | 2     | F   | 19               | OS          | A    | 83               | 0             | 0             |                  |                |                 |                     | No  | 0         | pT1  | Pos | Pos |                    |
| 58         | 2     | F   | 3                | OD          | E    | 87               | 2             | 0             |                  |                |                 |                     | Yes | 11        | pT1  | Pos | Pos |                    |
| 59         | 2     | M   | 4                | OD          | E    | 18               | 3             | 0             |                  |                |                 |                     | Yes | 3         | pT1  | Pos | Pos |                    |
| 60         | 2     | M   | 16               | OD          | E    | 18               | 10            | 2             |                  |                |                 |                     | Yes | 17        | pT4  | Neg | Neg | 18                 |
| 61         | 2     | M   | 23               | OS          | A    | 1                | 0             | 0             |                  |                |                 |                     | No  | 0         | N/A  | Pos | Pos |                    |
| 62         | 1     | M   | 4                | OD          | E    | 68               | 5             | 0             | 5                | 0              | 1               | Yes                 | Yes | 17        | pT1  | Pos | Pos |                    |
| 63         | 2     | M   | 8                | OS          | A    | 64               | 0             | 0             |                  |                |                 |                     | No  | 0         | pT1  | Pos | Pos |                    |
| 64         | 2     | M   | 10               | OS          | A    | 75               | 0             | 0             |                  |                |                 |                     | No  | 0         | pT1  | Pos | Pos |                    |
| 65         | 1     | M   | 2                | OS          | A    | 71               | 0             | 0             | 8                | 0              | 0               | No                  | No  |           |      | Pos | Pos |                    |
| 66         | 1     | F   | 19               | OD          | E    | 62               | 2             | 0             | 2                | 0              | 0               | No                  | No  |           |      | Pos | Pos |                    |
| 67         | 3     | M   | 38               | OS          | E    | 89               | 0             | 0             |                  |                |                 |                     | Yes | 0         | pT1  | Pos | Pos |                    |
| 68         | 3     | F   | 28               | OS          | E    | 92               | 0             | 0             |                  |                |                 |                     | Yes | 0         | pT3b | Pos | Pos |                    |
| 69         | 3     | M   | 41               | OD          | E    | 3                | 0             | 0             |                  |                |                 |                     | Yes | 0         | pT1  | Pos | Pos |                    |
| 70         | 3     | M   | 29               | OS          | E    | 88               | 0             | 0             |                  |                |                 |                     | Yes | 0         | pT3b | Pos | Pos |                    |
| 71         | 3     | F   | 18               | OD          | E    | 97               | 0             | 0             |                  |                |                 |                     | Yes | 0         | pT1  | Pos | Pos |                    |
| 72         | 3     | M   | 27               | OS          | E    | 90               | 0             | 0             |                  |                |                 |                     | Yes | 0         | pT1  | Pos | Pos |                    |

# Safety of Tylectomy in Salvage of Eyes Affected by Retinoblastoma

Raw data, Table S2

| Patient ID | Group | Sex | Age at Dx months | Studied Eye | IIRC | Follow-up Months | Pre-Tyl IVC # | Pre-Tyl IAC # | Dx to Tyl months | Post-Tyl IVC # | Post-Tyl Ivtc # | Post-Tyl Recurrence | Enu | Dx to Enu | pTNM | OS  | DDS | Dx to Death months |
|------------|-------|-----|------------------|-------------|------|------------------|---------------|---------------|------------------|----------------|-----------------|---------------------|-----|-----------|------|-----|-----|--------------------|
| 73         | 3     | M   | 15               | OD          | E    | 92               | 0             | 0             |                  |                |                 |                     | Yes | 0         | pT3b | Pos | Pos |                    |
| 74         | 3     | F   | 28               | OS          | E    | 100              | 0             | 0             |                  |                |                 |                     | Yes | 0         | pt2a | Pos | Pos |                    |
| 75         | 2     | M   | 4                | OD          | E    | 87               | 2             | 0             |                  |                |                 |                     | Yes | 33        | pT1  | Pos | Pos |                    |
| 76         | 3     | M   | 18               | OD          | E    | 86               | 0             | 0             |                  |                |                 |                     | Yes | 0         | pT3b | Pos | Pos |                    |
| 77         | 3     | M   | 2                | OD          | E    | 98               | 0             | 0             |                  |                |                 |                     | Yes | 0         | pT3b | Pos | Pos |                    |
| 78         | 3     | M   | 25               | OS          | E    | 100              | 0             | 0             |                  |                |                 |                     | Yes | 0         | pT1  | Pos | Pos |                    |
| 79         | 3     | F   | 26               | OD          | E    | 9                | 0             | 0             |                  |                |                 |                     | Yes | 0         | pT3d | Neg | Neg | 9                  |
| 80         | 3     | M   | 26               | OD          | E    | 95               | 0             | 0             |                  |                |                 |                     | Yes | 0         | pT1  | Pos | Pos |                    |
| 81         | 1     | M   | 19               | OD          | E    | 94               | 5             | 0             | 15               | 2              | 1               | No                  | No  |           |      | Pos | Pos |                    |
| 82         | 3     | M   | 28               | OS          | E    | 8                | 0             | 0             |                  |                |                 |                     | Yes | 0         | pT3b | Pos | Pos |                    |
| 83         | 3     | M   | 21               | OS          | E    | 99               | 0             | 0             |                  |                |                 |                     | Yes | 0         | pT2b | Pos | Pos |                    |
| 84         | 3     | F   | 26               | OD          | E    | 0                | 0             | 0             |                  |                |                 |                     | Yes | 0         | pT3b | Pos | Pos |                    |
| 85         | 3     | M   | 36               | OS          | E    | 98               | 0             | 0             |                  |                |                 |                     | Yes | 0         | pT1  | Pos | Pos |                    |
| 86         | 3     | M   | 15               | OD          | E    | 93               | 0             | 0             |                  |                |                 |                     | Yes | 0         | pT1  | Pos | Pos |                    |
| 87         | 3     | M   | 20               | OS          | E    | 85               | 0             | 0             |                  |                |                 |                     | Yes | 0         | pT4  | Pos | Pos |                    |
| 88         | 2     | M   | 29               | OD          | E    | 85               | 2             | 0             |                  |                |                 |                     | Yes | 2         | pT1  | Pos | Pos |                    |
| 89         | 3     | F   | 60               | OD          | E    | 0                | 0             | 0             |                  |                |                 |                     | Yes | 0         | pT3b | Pos | Pos |                    |
| 90         | 3     | F   | 23               | OD          | E    | 84               | 0             | 0             |                  |                |                 |                     | Yes | 0         | pT3b | Pos | Pos |                    |
| 91         | 3     | M   | 50               | OS          | E    | 97               | 0             | 0             |                  |                |                 |                     | Yes | 0         | pT1  | Pos | Pos |                    |
| 92         | 3     | F   | 15               | OS          | E    | 97               | 0             | 0             |                  |                |                 |                     | Yes | 0         | pT3b | Pos | Pos |                    |
| 93         | 3     | F   | 28               | OD          | E    | 86               | 0             | 0             |                  |                |                 |                     | Yes | 0         | pT4  | Pos | Pos |                    |
| 94         | 3     | F   | 32               | OD          | E    | 86               | 0             | 0             |                  |                |                 |                     | Yes | 0         | pT1  | Pos | Pos |                    |
| 95         | 3     | F   | 33               | OS          | E    | 4                | 0             | 0             |                  |                |                 |                     | Yes | 0         | pT3b | Pos | Pos |                    |
| 96         | 2     | F   | 33               | OD          | E    | 87               | 2             | 2             |                  |                |                 |                     | Yes | 4         | pT1  | Pos | Pos |                    |
| 97         | 2     | M   | 6                | OS          | E    | 86               | 2             | 0             |                  |                |                 |                     | Yes | 2         | pT1  | Pos | Pos |                    |
| 98         | 2     | F   | 39               | OS          | E    | 25               | 1             | 0             |                  |                |                 |                     | Yes | 1         | pT1  | Pos | Pos |                    |
| 99         | 3     | M   | 31               | OS          | E    | 7                | 0             | 0             |                  |                |                 |                     | Yes | 0         | pT3b | Neg | Neg | 7                  |
| 100        | 3     | F   | 20               | OS          | E    | 85               | 0             | 0             |                  |                |                 |                     | Yes | 0         | pT3b | Pos | Pos |                    |
| 101        | 3     | F   | 19               | OS          | E    | 3                | 0             | 0             |                  |                |                 |                     | Yes | 0         | pT1  | Pos | Pos |                    |
| 102        | 3     | F   | 32               | OD          | E    | 82               | 0             | 0             |                  |                |                 |                     | Yes | 0         | pT3b | Pos | Pos |                    |
| 103        | 3     | F   | 21               | OS          | E    | 79               | 0             | 0             |                  |                |                 |                     | Yes | 0         | pT1  | Pos | Pos |                    |
| 104        | 3     | M   | 29               | OD          | E    | 82               | 0             | 0             |                  |                |                 |                     | Yes | 0         | pT1  | Pos | Pos |                    |
| 105        | 3     | F   | 12               | OD          | E    | 88               | 0             | 0             |                  |                |                 |                     | Yes | 0         | pt3b | Pos | Pos |                    |
| 106        | 3     | F   | 26               | OS          | E    | 54               | 0             | 0             |                  |                |                 |                     | Yes | 0         | pT3b | Pos | Pos |                    |
| 107        | 3     | F   | 4                | OS          | E    | 81               | 0             | 0             |                  |                |                 |                     | Yes | 0         | N/A  | Pos | Pos |                    |
| 108        | 3     | M   | 15               | OD          | E    | 94               | 0             | 0             |                  |                |                 |                     | Yes | 0         | pT2a | Pos | Pos |                    |
| 109        | 3     | M   | 28               | OD          | E    | 9                | 0             | 0             |                  |                |                 |                     | Yes | 0         | pT4  | Pos | Pos |                    |
| 110        | 3     | F   | 14               | OS          | E    | 96               | 0             | 0             |                  |                |                 |                     | Yes | 0         | pT3b | Pos | Pos |                    |
| 111        | 3     | M   | 23               | OS          | E    | 84               | 0             | 0             |                  |                |                 |                     | Yes | 0         | pT1  | Pos | Pos |                    |
| 112        | 3     | M   | 55               | OS          | E    | 95               | 0             | 0             |                  |                |                 |                     | Yes | 0         | N/A  | Pos | Pos |                    |
| 113        | 2     | M   | 4                | OD          | E    | 81               | 2             | 0             |                  |                |                 |                     | Yes | 2         | pt3b | Pos | Pos |                    |
| 114        | 3     | M   | 23               | OD          | E    | 11               | 0             | 0             |                  |                |                 |                     | Yes | 0         | pT4  | Pos | Pos |                    |
| 115        | 1     | F   | 101              | OS          | E    | 95               | 1             | 0             | 4                | 0              | 6               | Yes                 | Yes | 10        | pT2a | Pos | Pos |                    |
| 116        | 1     | F   | 55               | OD          | E    | 84               | 4             | 0             | 5                | 0              | 4               | No                  | Yes | 16        | pT1  | Pos | Pos |                    |
| 117        | 3     | F   | 47               | OD          | E    | 83               | 0             | 0             |                  |                |                 |                     | Yes | 1         | pT2b | Pos | Pos |                    |
| 118        | 3     | F   | 32               | OD          | E    | 17               | 0             | 0             |                  |                |                 |                     | Yes | 0         | pT4  | Neg | Neg | 17                 |
| 119        | 2     | M   | 31               | OD          | E    | 84               | 6             | 0             |                  |                |                 |                     | Yes | 7         | pT1  | Pos | Pos |                    |
| 120        | 2     | M   | 20               | OD          | E    | 85               | 2             | 0             |                  |                |                 |                     | Yes | 2         | pT1  | Pos | Pos |                    |
| 121        | 3     | M   | 11               | OD          | E    | 8                | 0             | 0             |                  |                |                 |                     | Yes | 0         | pT2a | Pos | Pos |                    |
| 122        | 3     | M   | 13               | OD          | E    | 94               | 0             | 0             |                  |                |                 |                     | Yes | 0         | pT3b | Pos | Pos |                    |
| 123        | 3     | M   | 15               | OS          | E    | 94               | 0             | 0             |                  |                |                 |                     | Yes | 0         | pT2b | Pos | Pos |                    |
| 124        | 3     | M   | 4                | OD          | E    | 86               | 0             | 0             |                  |                |                 |                     | Yes | 0         | N/A  | Pos | Pos |                    |
| 125        | 3     | M   | 27               | OS          | E    | 83               | 0             | 0             |                  |                |                 |                     | Yes | 0         | pT1  | Pos | Pos |                    |
| 126        | 3     | M   | 22               | OD          | E    | 36               | 0             | 0             |                  |                |                 |                     | Yes | 0         | pT1  | Pos | Pos |                    |
| 127        | 3     | F   | 22               | OS          | E    | 79               | 0             | 0             |                  |                |                 |                     | Yes | 1         | pT1  | Pos | Pos |                    |
| 128        | 3     | M   | 13               | OS          | E    | 92               | 0             | 0             |                  |                |                 |                     | Yes | 0         | pT3d | Pos | Pos |                    |
| 129        | 3     | M   | 30               | OD          | E    | 79               | 0             | 0             |                  |                |                 |                     | Yes | 0         | pT2a | Pos | Pos |                    |
| 130        | 3     | M   | 54               | OS          | E    | 92               | 0             | 0             |                  |                |                 |                     | Yes | 0         | pT2a | Pos | Pos |                    |
| 131        | 3     | M   | 5                | OS          | E    | 84               | 0             | 0             |                  |                |                 |                     | Yes | 0         | pT1  | Pos | Pos |                    |
| 132        | 3     | M   | 14               | OS          | E    | 85               | 0             | 0             |                  |                |                 |                     | Yes | 0         | pT3a | Pos | Pos |                    |
| 133        | 3     | M   | 8                | OD          | E    | 82               | 0             | 0             |                  |                |                 |                     | Yes | 0         | pT1  | Pos | Pos |                    |
| 134        | 3     | M   | 21               | OS          | E    | 81               | 0             | 0             |                  |                |                 |                     | Yes | 0         | pT2a | Pos | Pos |                    |
| 135        | 3     | M   | 22               | OS          | E    | 84               | 0             | 0             |                  |                |                 |                     | Yes | 0         | pT1  | Pos | Pos |                    |
| 136        | 3     | M   | 61               | OD          | E    | 91               | 0             | 0             |                  |                |                 |                     | Yes | 0         | pT1  | Pos | Pos |                    |
| 137        | 3     | F   | 36               | OS          | E    | 82               | 0             | 0             |                  |                |                 |                     | Yes | 0         | pT1  | Pos | Pos |                    |
| 138        | 1     | M   | 5                | OD          | E    | 78               | 5             | 0             | 7                | 0              | 0               | Yes                 | Yes | 24        | pT1  | Pos | Pos |                    |
| 139        | 3     | F   | 20               | OS          | E    | 78               | 0             | 0             |                  |                |                 |                     | Yes | 0         | pT1  | Pos | Pos |                    |
| 140        | 3     | M   | 10               | OS          | E    | 16               | 0             | 0             |                  |                |                 |                     | Yes | 0         | pT1  | Pos | Pos |                    |
| 141        | 3     | F   | 5                | OS          | E    | 91               | 0             | 0             |                  |                |                 |                     | Yes | 0         | pT1  | Pos | Pos |                    |
| 142        | 1     | F   | 7                | OS          | E    | 89               | 4             | 0             | 6                | 0              | 1               | No                  | No  |           |      | Pos | Pos |                    |
| 143        | 3     | M   | 20               | OS          | E    | 83               | 0             | 0             |                  |                |                 |                     | Yes | 0         | N/A  | Pos | Pos |                    |
| 144        | 3     | F   | 11               | OD          | E    | 88               | 0             | 0             |                  |                |                 |                     | Yes | 0         | pT3b | Pos | Pos |                    |

# Safety of Tylectomy in Salvage of Eyes Affected by Retinoblastoma

Raw data, Table S2

| Patient ID | Group | Sex | Age at Dx months | Studied Eye | IIRC | Follow-up Months | Pre-Tyl IVC # | Pre-Tyl IAC # | Dx to Tyl months | Post-Tyl IVC # | Post-Tyl Ivtc # | Post-Tyl Recurrence | Enu | Dx to Enu | pTNM | OS  | DDS | Dx to Death months |
|------------|-------|-----|------------------|-------------|------|------------------|---------------|---------------|------------------|----------------|-----------------|---------------------|-----|-----------|------|-----|-----|--------------------|
| 145        | 3     | M   | 43               | OD          | E    | 74               | 0             | 0             |                  |                |                 |                     | Yes | 0         | pT3b | Pos | Pos |                    |
| 146        | 3     | M   | 34               | OS          | E    | 90               | 0             | 0             |                  |                |                 |                     | Yes | 0         | pT3b | Pos | Pos |                    |
| 147        | 2     | M   | 18               | OD          | E    | 19               | 2             | 0             |                  |                |                 |                     | Yes | 10        | pT4  | Neg | Neg | 19                 |
| 148        | 3     | M   | 16               | OS          | E    | 79               | 0             | 0             |                  |                |                 |                     | Yes | 0         | pT3b | Pos | Pos |                    |
| 149        | 2     | F   | 22               | OS          | E    | 73               | 1             | 0             |                  |                |                 |                     | Yes | 1         | pT1  | Pos | Pos |                    |
| 150        | 2     | M   | 28               | OD          | E    | 88               | 2             | 0             |                  |                |                 |                     | Yes | 2         | pT1  | Pos | Pos |                    |
| 151        | 3     | M   | 25               | OD          | E    | 13               | 0             | 0             |                  |                |                 |                     | Yes | 0         | pT1  | Pos | Pos |                    |
| 152        | 3     | F   | 2                | OD          | E    | 82               | 0             | 0             |                  |                |                 |                     | Yes | 0         | N/A  | Pos | Pos |                    |
| 153        | 3     | F   | 16               | OS          | E    | 0                | 0             | 0             |                  |                |                 |                     | Yes | 0         | pT1  | Pos | Pos |                    |
| 154        | 3     | M   | 36               | OS          | E    | 5                | 0             | 0             |                  |                |                 |                     | Yes | 0         | pT3b | Neg | Neg | 5                  |
| 155        | 3     | M   | 77               | OS          | E    | 17               | 0             | 0             |                  |                |                 |                     | Yes | 1         | N/A  | Pos | Pos |                    |
| 156        | 3     | M   | 19               | OS          | E    | 22               | 0             | 0             |                  |                |                 |                     | Yes | 0         | pT1  | Pos | Pos |                    |
| 157        | 3     | F   | 23               | OD          | E    | 89               | 0             | 0             |                  |                |                 |                     | Yes | 0         | pT1  | Pos | Pos |                    |
| 158        | 3     | F   | 10               | OS          | E    | 16               | 0             | 0             |                  |                |                 |                     | Yes | 0         | pT3b | Pos | Pos |                    |
| 159        | 3     | F   | 23               | OS          | E    | 78               | 0             | 0             |                  |                |                 |                     | Yes | 0         | pT3b | Pos | Pos |                    |
| 160        | 3     | M   | 23               | OD          | E    | 81               | 0             | 0             |                  |                |                 |                     | Yes | 0         | pT1  | Pos | Pos |                    |
| 161        | 3     | M   | 26               | OS          | E    | 72               | 0             | 0             |                  |                |                 |                     | Yes | 0         | pT3b | Pos | Pos |                    |
| 162        | 3     | F   | 33               | OS          | E    | 88               | 0             | 0             |                  |                |                 |                     | Yes | 0         | pT1  | Pos | Pos |                    |
| 163        | 1     | F   | 20               | OS          | D    | 75               | 2             | 0             | 2                | 0              | 1               | Yes                 | Yes | 3         | pT1  | Pos | Pos |                    |
| 164        | 3     | F   | 45               | OD          | E    | 75               | 0             | 0             |                  |                |                 |                     | Yes | 0         | pT2a | Pos | Pos |                    |
| 165        | 3     | M   | 16               | OS          | E    | 86               | 0             | 0             |                  |                |                 |                     | Yes | 0         | pT3b | Pos | Pos |                    |
| 166        | 2     | M   | 49               | OD          | E    | 80               | 2             | 0             |                  |                |                 |                     | Yes | 2         | pT3b | Pos | Pos |                    |
| 167        | 3     | M   | 71               | OS          | E    | 81               | 0             | 0             |                  |                |                 |                     | Yes | 0         | pT1  | Pos | Pos |                    |
| 168        | 3     | M   | 22               | OS          | E    | 74               | 0             | 0             |                  |                |                 |                     | Yes | 0         | pT2a | Pos | Pos |                    |
| 169        | 3     | M   | 3                | OD          | E    | 20               | 0             | 0             |                  |                |                 |                     | Yes | 12        | pT4  | Neg | Neg | 20                 |
| 170        | 3     | M   | 29               | OS          | E    | 10               | 0             | 0             |                  |                |                 |                     | Yes | 0         | pT3b | Neg | Neg | 10                 |
| 171        | 3     | M   | 35               | OD          | E    | 27               | 0             | 0             |                  |                |                 |                     | Yes | 0         | pT4  | Neg | Neg | 27                 |
| 172        | 1     | F   | 25               | OD          | E    | 75               | 3             | 0             | 3                | 1              | 0               | No                  | No  |           |      | Pos | Pos |                    |
| 173        | 3     | F   | 17               | OS          | E    | 86               | 0             | 0             |                  |                |                 |                     | Yes | 0         | pT3b | Pos | Pos |                    |
| 174        | 3     | F   | 21               | OS          | E    | 87               | 0             | 0             |                  |                |                 |                     | Yes | 0         | pT2a | Pos | Pos |                    |
| 175        | 1     | F   | 100              | OD          | E    | 6                | 1             | 0             | 1                | 6              | 0               | Yes                 | No  |           |      | Neg | Pos | 6                  |
| 176        | 1     | M   | 8                | OD          | E    | 77               | 3             | 0             | 3                | 1              | 1               | No                  | No  |           |      | Pos | Pos |                    |
| 177        | 1     | M   | 13               | OD          | E    | 76               | 3             | 0             | 3                | 0              | 0               | No                  | No  |           |      | Pos | Pos |                    |
| 178        | 3     | M   | 17               | OD          | E    | 73               | 0             | 0             |                  |                |                 |                     | Yes | 0         | pT3b | Pos | Pos |                    |
| 179        | 3     | F   | 2                | OS          | E    | 86               | 0             | 0             |                  |                |                 |                     | Yes | 0         | pT1  | Pos | Pos |                    |
| 180        | 1     | M   | 104              | OD          | E    | 76               | 0             | 0             | 0                | 6              | 0               | No                  | No  |           |      | Pos | Pos |                    |
| 181        | 3     | M   | 111              | OD          | E    | 72               | 0             | 0             |                  |                |                 |                     | Yes | 0         | pT3b | Pos | Pos |                    |
| 182        | 3     | F   | 7                | OS          | E    | 75               | 0             | 0             |                  |                |                 |                     | Yes | 0         | pT1  | Pos | Pos |                    |
| 183        | 3     | M   | 15               | OS          | E    | 75               | 0             | 0             |                  |                |                 |                     | Yes | 1         | pT1  | Pos | Pos |                    |
| 184        | 3     | M   | 28               | OS          | E    | 13               | 0             | 0             |                  |                |                 |                     | Yes | 0         | N/A  | Pos | Pos |                    |
| 185        | 2     | F   | 34               | OS          | E    | 85               | 2             | 0             |                  |                |                 |                     | Yes | 2         | pT1  | Pos | Pos |                    |
| 186        | 2     | M   | 6                | OD          | E    | 10               | 1             | 0             |                  |                |                 |                     | No  |           |      | Pos | Pos |                    |
| 187        | 3     | F   | 44               | OD          | E    | 85               | 0             | 0             |                  |                |                 |                     | Yes | 0         | pT2b | Pos | Pos |                    |
| 188        | 1     | M   | 20               | OD          | E    | 76               | 3             | 0             | 3                | 1              | 0               | Yes                 | No  |           |      | Pos | Pos |                    |
| 189        | 1     | M   | 40               | OD          | E    | 71               | 2             | 0             | 2                | 2              | 1               | Yes                 | Yes | 26        | pT3a | Pos | Pos |                    |
| 190        | 3     | M   | 14               | OS          | E    | 76               | 0             | 0             |                  |                |                 |                     | Yes | 0         | pT3a | Pos | Pos |                    |
| 191        | 2     | F   | 30               | OS          | E    | 59               | 0             | 2             |                  |                |                 |                     | Yes | 3         | N/A  | Pos | Pos |                    |
| 192        | 2     | M   | 4                | OS          | E    | 78               | 1             | 0             |                  |                |                 |                     | Yes | 3         | pT1  | Pos | Pos |                    |
| 193        | 1     | F   | 15               | OD          | E    | 73               | 1             | 0             | 1                | 2              | 0               | No                  | No  |           |      | Pos | Pos |                    |
| 194        | 3     | F   | 55               | OS          | E    | 76               | 0             | 0             |                  |                |                 |                     | Yes | 0         | pT3a | Pos | Pos |                    |
| 195        | 3     | F   | 54               | OS          | E    | 35               | 0             | 0             |                  |                |                 |                     | Yes | 0         | pT1  | Pos | Pos |                    |
| 196        | 1     | F   | 32               | OD          | E    | 6                | 3             | 0             | 3                | 1              | 0               | No                  | No  |           |      | Pos | Pos |                    |
| 197        | 1     | M   | 31               | OS          | E    | 74               | 0             | 0             | 1                | 3              | 0               | Yes                 | Yes | 11        | pT1  | Pos | Pos |                    |
| 198        | 3     | M   | 24               | OD          | E    | 10               | 0             | 0             |                  |                |                 |                     | Yes | 0         | pT3d | Neg | Neg | 11                 |
| 199        | 3     | M   | 26               | OD          | E    | 47               | 0             | 0             |                  |                |                 |                     | Yes | 0         | pT3b | Pos | Pos |                    |
| 200        | 1     | F   | 7                | OD          | E    | 66               | 3             | 0             | 2                | 2              | 1               | Yes                 | Yes | 14        | pT3a | Pos | Pos |                    |
| 201        | 3     | F   | 11               | OD          | E    | 77               | 0             | 0             |                  |                |                 |                     | Yes | 0         | pT1  | Pos | Pos |                    |
| 202        | 2     | F   | 22               | OS          | E    | 69               | 2             | 0             |                  |                |                 |                     | Yes | 3         | pT2a | Pos | Pos |                    |
| 203        | 2     | F   | 22               | OD          | E    | 77               | 2             | 0             |                  |                |                 |                     | Yes | 2         | pT1  | Pos | Pos |                    |
| 204        | 3     | F   | 56               | OS          | E    | 65               | 0             | 0             |                  |                |                 |                     | Yes | 0         | pT1  | Pos | Pos |                    |
| 205        | 2     | M   | 37               | OS          | E    | 82               | 2             | 0             |                  |                |                 |                     | Yes | 2         | pT1  | Pos | Pos |                    |
| 206        | 2     | M   | 51               | OD          | E    | 73               | 6             | 2             |                  |                |                 |                     | Yes | 8         | pT1  | Pos | Pos |                    |
| 207        | 1     | M   | 22               | OD          | E    | 71               | 2             | 0             | 2                | 1              | 0               | Yes                 | No  |           |      | Pos | Pos |                    |
| 208        | 3     | F   | 14               | OD          | E    | 73               | 0             | 0             |                  |                |                 |                     | Yes | 0         | pT1  | Pos | Pos |                    |
| 209        | 2     | F   | 3                | OD          | E    | 14               | 0             | 4             |                  |                |                 |                     | Yes | 7         | pT4  | Neg | Neg | 14                 |
| 210        | 3     | M   | 21               | OD          | E    | 67               | 0             | 0             |                  |                |                 |                     | Yes | 0         | pT3b | Pos | Pos |                    |
| 211        | 1     | F   | 27               | OS          | E    | 65               | 3             | 0             | 3                | 2              | 3               | No                  | No  |           |      | Pos | Pos |                    |
| 212        | 3     | F   | 31               | OS          | E    | 72               | 0             | 0             |                  |                |                 |                     | Yes | 0         | pT3b | Pos | Pos |                    |
| 213        | 1     | F   | 2                | OS          | E    | 63               | 3             | 0             | 3                | 1              | 0               | No                  | No  |           |      | Pos | Pos |                    |
| 214        | 3     | M   | 27               | OD          | E    | 80               | 0             | 0             |                  |                |                 |                     | Yes | 0         | N/A  | Pos | Pos |                    |
| 215        | 2     | M   | 27               | OS          | E    | 72               | 2             | 0             |                  |                |                 |                     | Yes | 2         | pT1  | Pos | Pos |                    |
| 216        | 3     | M   | 16               | OS          | E    | 73               | 0             | 0             |                  |                |                 |                     | Yes | 0         | pT1  | Pos | Pos |                    |

# Safety of Tylectomy in Salvage of Eyes Affected by Retinoblastoma

Raw data, Table S2

| Patient ID | Group | Sex | Age at Dx months | Studied Eye | IIRC | Follow-up Months | Pre-Tyl IVC # | Pre-Tyl IAC # | Dx to Tyl months | Post-Tyl IVC # | Post-Tyl Ivtc # | Post-Tyl Recurrence | Enu | Dx to Enu | pTNM | OS  | DDS | Dx to Death months |
|------------|-------|-----|------------------|-------------|------|------------------|---------------|---------------|------------------|----------------|-----------------|---------------------|-----|-----------|------|-----|-----|--------------------|
| 217        | 2     | F   | 2                | OD          | E    | 73               | 2             | 0             |                  |                |                 |                     | Yes | 2         | pT1  | Pos | Pos |                    |
| 218        | 1     | M   | 29               | OD          | E    | 64               | 1             | 0             | 0                | 1              | 3               | Yes                 | Yes | 5         | pT1  | Pos | Pos |                    |
| 219        | 1     | M   | 19               | OD          | E    | 66               | 5             | 0             | 6                | 0              | 0               | Yes                 | No  |           |      | Pos | Pos |                    |
| 220        | 3     | F   | 25               | OD          | E    | 67               | 0             | 0             |                  |                |                 |                     | Yes | 0         | pT1  | Pos | Pos |                    |
| 221        | 2     | F   | 16               | OS          | E    | 2                | 2             | 0             |                  |                |                 |                     | Yes | 2         | pT1  | Pos | Pos |                    |
| 222        | 3     | M   | 10               | OS          | E    | 71               | 0             | 0             |                  |                |                 |                     | Yes | 0         | pT2a | Pos | Pos |                    |
| 223        | 2     | F   | 3                | OD          | E    | 5                | 5             | 0             |                  |                |                 |                     | No  |           |      | Pos | Pos |                    |
| 224        | 1     | M   | 19               | OD          | E    | 71               | 3             | 0             | 2                | 3              | 0               | No                  | No  |           |      | Pos | Pos |                    |
| 225        | 1     | F   | 35               | OD          | E    | 67               | 1             | 0             | 2                | 3              | 3               | No                  | No  |           |      | Pos | Pos |                    |
| 226        | 2     | M   | 57               | OD          | E    | 78               | 2             | 0             |                  |                |                 |                     | Yes | 3         | pt4  | Pos | Pos |                    |
| 227        | 3     | M   | 17               | OS          | E    | 62               | 0             | 0             |                  |                |                 |                     | Yes | 0         | pT1  | Pos | Pos |                    |
| 228        | 1     | M   | 20               | OD          | E    | 69               | 3             | 2             | 5                | 0              | 0               | No                  | No  |           |      | Pos | Pos |                    |
| 229        | 3     | M   | 30               | OD          | E    | 65               | 0             | 0             |                  |                |                 |                     | Yes | 0         | pT3b | Pos | Pos |                    |
| 230        | 2     | M   | 11               | OD          | E    | 77               | 2             | 0             |                  |                |                 |                     | Yes | 4         | pT1  | Pos | Pos |                    |
| 231        | 1     | F   | 14               | OD          | E    | 69               | 1             | 0             | 1                | 2              | 1               | No                  | No  |           |      | Pos | Pos |                    |
| 232        | 2     | M   | 39               | OS          | E    | 62               | 2             | 0             |                  |                |                 |                     | Yes | 3         | pT1  | Pos | Pos |                    |
| 233        | 3     | F   | 49               | OS          | E    | 77               | 0             | 0             |                  |                |                 |                     | Yes | 0         | pT3b | Pos | Pos |                    |
| 234        | 3     | M   | 18               | OS          | E    | 49               | 0             | 0             |                  |                |                 |                     | Yes | 0         | pT1  | Pos | Pos |                    |
| 235        | 3     | M   | 28               | OD          | E    | 65               | 0             | 0             |                  |                |                 |                     | Yes | 1         | N/A  | Pos | Pos |                    |
| 236        | 3     | F   | 29               | OS          | E    | 68               | 0             | 0             |                  |                |                 |                     | Yes | 0         | pT3b | Pos | Pos |                    |
| 237        | 3     | F   | 29               | OD          | E    | 72               | 0             | 0             |                  |                |                 |                     | Yes | 0         | pT1  | Pos | Pos |                    |
| 238        | 2     | F   | 14               | OD          | E    | 1                | 2             | 0             |                  |                |                 |                     | No  |           |      | Pos | Pos |                    |
| 239        | 3     | M   | 20               | OS          | E    | 63               | 0             | 0             |                  |                |                 |                     | Yes | 0         | pT1  | Pos | Pos |                    |
| 240        | 1     | M   | 34               | OD          | E    | 64               | 2             | 0             | 3                | 1              | 1               | No                  | No  |           |      | Pos | Pos |                    |
| 241        | 3     | M   | 8                | OD          | E    | 68               | 0             | 0             |                  |                |                 |                     | Yes | 0         | N/A  | Pos | Pos |                    |
| 242        | 3     | M   | 17               | OD          | E    | 65               | 0             | 0             |                  |                |                 |                     | Yes | 0         | pT3b | Pos | Pos |                    |
| 243        | 2     | F   | 40               | OD          | E    | 60               | 1             | 0             |                  |                |                 |                     | Yes | 1         | pT3b | Pos | Pos |                    |
| 244        | 2     | M   | 25               | OS          | E    | 62               | 0             | 1             |                  |                |                 |                     | Yes | 1         | pT3a | Pos | Pos |                    |
| 245        | 1     | M   | 70               | OS          | E    | 65               | 3             | 0             | 3                | 0              | 0               | No                  | No  |           |      | Pos | Pos |                    |
| 246        | 2     | M   | 9                | OS          | E    | 68               | 1             | 0             |                  |                |                 |                     | Yes | 1         | pT1  | Pos | Pos |                    |
| 247        | 3     | F   | 22               | OD          | E    | 3                | 0             | 0             |                  |                |                 |                     | Yes | 0         | pT1  | Pos | Pos |                    |
| 248        | 3     | F   | 11               | OD          | E    | 74               | 0             | 0             |                  |                |                 |                     | Yes | 0         | pT1  | Pos | Pos |                    |
| 249        | 3     | F   | 19               | OD          | E    | 73               | 0             | 0             |                  |                |                 |                     | Yes | 1         | pT1  | Pos | Pos |                    |
| 250        | 3     | F   | 20               | OD          | E    | 75               | 0             | 0             |                  |                |                 |                     | Yes | 1         | pT3b | Pos | Pos |                    |
| 251        | 1     | M   | 81               | OS          | E    | 68               | 0             | 0             | 1                | 1              | 0               | No                  | Yes | 2         | pT1  | Pos | Pos |                    |
| 252        | 3     | M   | 16               | OD          | E    | 64               | 0             | 0             |                  |                |                 |                     | Yes | 0         | pT1  | Pos | Pos |                    |
| 253        | 2     | M   | 18               | OS          | E    | 60               | 2             | 0             |                  |                |                 |                     | Yes | 2         | pT3b | Pos | Pos |                    |
| 254        | 2     | M   | 27               | OS          | E    | 74               | 1             | 0             |                  |                |                 |                     | Yes | 1         | pT1  | Pos | Pos |                    |
| 255        | 2     | M   | 20               | OD          | E    | 63               | 1             | 0             |                  |                |                 |                     | Yes | 1         | pT1  | Pos | Pos |                    |
| 256        | 2     | F   | 17               | OS          | E    | 74               | 1             | 0             |                  |                |                 |                     | Yes | 1         | pT1  | Pos | Pos |                    |
| 257        | 1     | M   | 42               | OS          | E    | 64               | 0             | 0             | 0                | 4              | 1               | No                  | No  |           |      | Pos | Pos |                    |
| 258        | 2     | F   | 40               | OS          | E    | 60               | 0             | 3             |                  |                |                 |                     | Yes | 36        | pT3d | Pos | Pos |                    |
| 259        | 3     | F   | 28               | OD          | E    | 4                | 0             | 0             |                  |                |                 |                     | Yes | 0         | pT4  | Neg | Neg | 4                  |
| 260        | 3     | F   | 11               | OS          | E    | 66               | 0             | 0             |                  |                |                 |                     | Yes | 0         | pT3b | Pos | Pos |                    |
| 261        | 3     | M   | 19               | OD          | E    | 66               | 0             | 0             |                  |                |                 |                     | Yes | 0         | pT3d | Pos | Pos |                    |
| 262        | 3     | M   | 18               | OD          | E    | 58               | 0             | 0             |                  |                |                 |                     | Yes | 0         | pT3d | Pos | Pos |                    |
| 263        | 3     | F   | 39               | OD          | E    | 8                | 0             | 0             |                  |                |                 |                     | Yes | 0         | pT3a | Pos | Pos |                    |
| 264        | 3     | M   | 12               | OD          | E    | 62               | 0             | 0             |                  |                |                 |                     | Yes | 0         | pT1  | Pos | Pos |                    |
| 265        | 1     | M   | 6                | OD          | E    | 60               | 0             | 0             | 0                | 3              | 1               | No                  | No  |           |      | Pos | Pos |                    |
| 266        | 3     | M   | 23               | OD          | E    | 11               | 0             | 0             |                  |                |                 |                     | Yes | 0         | pT3b | Neg | Neg | 11                 |
| 267        | 3     | M   | 5                | OD          | E    | 59               | 0             | 0             |                  |                |                 |                     | Yes | 0         | pT1  | Pos | Pos |                    |
| 268        | 3     | F   | 21               | OD          | E    | 58               | 0             | 0             |                  |                |                 |                     | Yes | 0         | pT1  | Pos | Pos |                    |
| 269        | 3     | M   | 34               | OD          | E    | 57               | 0             | 0             |                  |                |                 |                     | Yes | 0         | pT3b | Pos | Pos |                    |
| 270        | 3     | M   | 17               | OS          | E    | 71               | 0             | 0             |                  |                |                 |                     | Yes | 0         | pT1  | Pos | Pos |                    |
| 271        | 3     | M   | 31               | OS          | E    | 61               | 0             | 0             |                  |                |                 |                     | Yes | 0         | pT3b | Pos | Pos |                    |
| 272        | 3     | F   | 18               | OS          | E    | 60               | 0             | 0             |                  |                |                 |                     | Yes | 0         | pT1  | Pos | Pos |                    |
| 273        | 3     | M   | 1                | OS          | E    | 59               | 0             | 0             |                  |                |                 |                     | Yes | 1         | pT1  | Pos | Pos |                    |
| 274        | 1     | M   | 34               | OD          | E    | 59               | 0             | 0             | 0                | 3              | 0               | No                  | No  |           |      | Pos | Pos |                    |
| 275        | 3     | M   | 28               | OD          | E    | 59               | 0             | 0             |                  |                |                 |                     | Yes | 0         | pT1  | Pos | Pos |                    |
| 276        | 3     | F   | 24               | OS          | E    | 9                | 0             | 0             |                  |                |                 |                     | Yes | 0         | N/A  | Neg | Neg | 9                  |
| 277        | 1     | F   | 20               | OD          | E    | 64               | 2             | 0             | 2                | 0              | 0               | No                  | No  |           |      | Pos | Pos |                    |
| 278        | 2     | F   | 13               | OD          | E    | 59               | 2             | 1             |                  |                |                 |                     | Yes | 3         | pT1  | Pos | Pos |                    |
| 279        | 2     | F   | 22               | OD          | E    | 62               | 1             | 0             |                  |                |                 |                     | Yes | 1         | N/A  | Pos | Pos |                    |
| 280        | 3     | M   | 33               | OD          | E    | 59               | 0             | 0             |                  |                |                 |                     | Yes | 0         | pT2b | Pos | Pos |                    |
| 281        | 3     | F   | 19               | OS          | E    | 66               | 0             | 0             |                  |                |                 |                     | Yes | 0         | pT1  | Pos | Pos |                    |
| 282        | 3     | M   | 18               | OS          | E    | 58               | 0             | 0             |                  |                |                 |                     | Yes | 0         | pT4  | Pos | Pos |                    |
| 283        | 2     | F   | 25               | OS          | E    | 56               | 1             | 0             |                  |                |                 |                     | Yes | 1         | pT1  | Pos | Pos |                    |
| 284        | 2     | M   | 23               | OD          | E    | 61               | 3             | 0             |                  |                |                 |                     | Yes | 3         | pT3a | Pos | Pos |                    |
| 285        | 2     | M   | 31               | OD          | E    | 66               | 1             | 0             |                  |                |                 |                     | Yes | 1         | pT1  | Pos | Pos |                    |
| 286        | 2     | M   | 18               | OD          | E    | 58               | 3             | 0             |                  |                |                 |                     | Yes | 3         | pT1  | Pos | Pos |                    |
| 287        | 2     | F   | 19               | OS          | E    | 61               | 1             | 0             |                  |                |                 |                     | Yes | 1         | pT1  | Pos | Pos |                    |
| 288        | 2     | F   | 18               | OD          | E    | 61               | 0             | 3             |                  |                |                 |                     | No  |           |      | Pos | Pos |                    |

# Safety of Tylectomy in Salvage of Eyes Affected by Retinoblastoma

Raw data, Table S2

| Patient ID | Group | Sex | Age at Dx months | Studied Eye | IIRC | Follow-up Months | Pre-Tyl IVC # | Pre-Tyl IAC # | Dx to Tyl months | Post-Tyl IVC # | Post-Tyl Ivtc # | Post-Tyl Recurrence | Enu | Dx to Enu | pTNM | OS  | DDS | Dx to Death months |
|------------|-------|-----|------------------|-------------|------|------------------|---------------|---------------|------------------|----------------|-----------------|---------------------|-----|-----------|------|-----|-----|--------------------|
| 289        | 2     | M   | 46               | OS          | E    | 2                | 0             | 2             |                  |                |                 |                     | Yes | 2         | pT1  | Pos | Pos |                    |
| 290        | 2     | F   | 38               | OS          | E    | 68               | 2             | 0             |                  |                |                 |                     | Yes | 22        | pT4  | Pos | Pos |                    |
| 291        | 3     | M   | 31               | OD          | E    | 55               | 0             | 0             |                  |                |                 |                     | Yes | 0         | pT1  | Pos | Pos |                    |
| 292        | 2     | M   | 18               | OD          | E    | 16               | 1             | 0             |                  |                |                 |                     | Yes | 8         | pT4  | Neg | Neg | 17                 |
| 293        | 1     | M   | 4                | OD          | E    | 60               | 3             | 0             | 4                | 1              | 0               | No                  | No  |           |      | Pos | Pos |                    |
| 294        | 2     | F   | 16               | OS          | E    | 52               | 4             | 2             |                  |                |                 |                     | Yes | 7         | N/A  | Pos | Pos |                    |
| 295        | 1     | F   | 4                | OD          | E    | 62               | 0             | 1             | 1                | 1              | 0               | No                  | No  |           |      | Pos | Pos |                    |
| 296        | 3     | F   | 35               | OD          | E    | 60               | 0             | 0             |                  |                |                 |                     | Yes | 0         | pT1  | Pos | Pos |                    |
| 297        | 2     | M   | 22               | OD          | E    | 12               | 1             | 0             |                  |                |                 |                     | Yes | 1         | pT3b | Neg | Neg | 12                 |
| 298        | 2     | M   | 53               | OS          | E    | 53               | 1             | 0             |                  |                |                 |                     | Yes | 2         | pT1  | Pos | Pos |                    |
| 299        | 2     | F   | 20               | OD          | E    | 68               | 1             | 0             |                  |                |                 |                     | Yes | 1         | pT3a | Pos | Pos |                    |
| 300        | 3     | M   | 24               | OD          | E    | 54               | 0             | 0             |                  |                |                 |                     | Yes | 0         | pT3b | Pos | Pos |                    |
| 301        | 2     | M   | 23               | OD          | E    | 67               | 2             | 0             |                  |                |                 |                     | Yes | 2         | pT1  | Pos | Pos |                    |
| 302        | 3     | M   | 18               | OD          | E    | 66               | 0             | 0             |                  |                |                 |                     | Yes | 0         | pT3d | Pos | Pos |                    |
| 303        | 3     | F   | 32               | OD          | E    | 0                | 0             | 0             |                  |                |                 |                     | Yes | 0         | pT1  | Pos | Pos |                    |
| 304        | 2     | M   | 25               | OD          | E    | 53               | 0             | 2             |                  |                |                 |                     | Yes | 2         | pT1  | Pos | Pos |                    |
| 305        | 2     | F   | 27               | OS          | E    | 51               | 1             | 0             |                  |                |                 |                     | Yes | 1         | pT1  | Pos | Pos |                    |
| 306        | 2     | M   | 2                | OD          | E    | 56               | 4             | 0             |                  |                |                 |                     | Yes | 15        | pT1  | Pos | Pos |                    |
| 307        | 2     | M   | 20               | OS          | E    | 67               | 2             | 0             |                  |                |                 |                     | Yes | 2         | pT1  | Pos | Pos |                    |
| 308        | 2     | M   | 1                | OS          | E    | 55               | 1             | 0             |                  |                |                 |                     | Yes | 3         | pT1  | Pos | Pos |                    |
| 309        | 1     | M   | 34               | OD          | E    | 65               | 2             | 0             | 3                | 2              | 0               | Yes                 | Yes | 12        | pT2b | Pos | Pos |                    |
| 310        | 2     | F   | 16               | OD          | D    | 88               | 5             | 0             |                  |                |                 |                     | No  |           |      | Pos | Pos |                    |
| 311        | 1     | F   | 5                | OD          | D    | 83               | 8             | 0             | 12               | 5              | 0               | No                  | No  |           |      | Pos | Pos |                    |
| 312        | 2     | M   | 5                | OD          | D    | 82               | 5             | 0             |                  |                |                 |                     | No  |           |      | Pos | Pos |                    |
| 313        | 1     | F   | 15               | OD          | D    | 90               | 4             | 2             | 9                | 0              | 4               | No                  | No  |           |      | Pos | Pos |                    |
| 314        | 2     | M   | 5                | OD          | D    | 38               | 2             | 0             |                  |                |                 |                     | No  |           |      | Neg | Neg | 38                 |
| 315        | 2     | F   | 6                | OD          | D    | 8                | 2             | 3             |                  |                |                 |                     | No  |           |      | Pos | Pos |                    |
| 316        | 2     | F   | 8                | OD          | D    | 27               | 2             | 0             |                  |                |                 |                     | No  |           |      | Neg | Neg | 27                 |
| 317        | 2     | F   | 20               | OD          | D    | 78               | 4             | 7             |                  |                |                 |                     | No  |           |      | Pos | Pos |                    |
| 318        | 2     | M   | 20               | OD          | D    | 42               | 3             | 0             |                  |                |                 |                     | Yes | 26        | N/A  | Pos | Pos |                    |
| 319        | 2     | M   | 17               | OD          | D    | 4                | 4             | 0             |                  |                |                 |                     | No  |           |      | Pos | Pos |                    |
| 320        | 1     | M   | 17               | OS          | E    | 69               | 4             | 9             | 50               | 2              | 0               | Yes                 | Yes | 58        | pT3d | Pos | Pos |                    |
| 321        | 2     | F   | 15               | OD          | D    | 5                | 4             | 0             |                  |                |                 |                     | No  |           |      | Pos | Pos |                    |
| 322        | 2     | M   | 14               | OD          | D    | 14               | 2             | 0             |                  |                |                 |                     | No  |           |      | Pos | Pos |                    |
| 323        | 2     | F   | 7                | OD          | D    | 61               | 2             | 0             |                  |                |                 |                     | Yes | 46        | N/A  | Pos | Pos |                    |
| 324        | 1     | M   | 3                | OD          | D    | 67               | 3             | 1             | 21               | 2              | 0               | No                  | No  |           |      | Pos | Pos |                    |
| 325        | 2     | F   | 8                | OS          | E    | 15               | 1             | 0             |                  |                |                 |                     | No  |           |      | Neg | Neg | 15                 |
| 326        | 2     | F   | 15               | OD          | D    | 23               | 6             | 0             |                  |                |                 |                     | No  |           |      | Neg | Neg | 23                 |
| 327        | 1     | M   | 7                | OS          | D    | 23               | 8             | 0             | 15               | 0              | 0               | Yes                 | No  |           |      | Neg | Neg | 23                 |
| 328        | 2     | M   | 13               | OD          | D    | 94               | 8             | 0             |                  |                |                 |                     | Yes | 10        | pT2a | Pos | Pos |                    |
| 329        | 1     | F   | 4                | OS          | D    | 88               | 7             | 0             | 13               | 0              | 0               | Yes                 | No  |           |      | Pos | Pos |                    |
| 330        | 1     | M   | 5                | OD          | D    | 85               | 7             | 2             | 9                | 0              | 0               | Yes                 | No  |           |      | Pos | Pos |                    |
| 331        | 1     | M   | 18               | OD          | D    | 87               | 6             | 0             | 12               | 0              | 0               | No                  | No  |           |      | Pos | Pos |                    |
| 332        | 1     | M   | 22               | OD          | D    | 88               | 3             | 3             | 9                | 1              | 0               | Yes                 | No  |           |      | Pos | Pos |                    |
| 333        | 1     | M   | 17               | OD          | D    | 77               | 5             | 2             | 10               | 0              | 0               | No                  | No  |           |      | Pos | Pos |                    |
| 334        | 1     | F   | 7                | OS          | D    | 25               | 6             | 0             | 11               | 0              | 0               | Yes                 | No  |           |      | Neg | Neg | 25                 |
| 335        | 1     | M   | 3                | OD          | D    | 18               | 3             | 0             | 6                | 0              | 0               | No                  | No  |           |      | Pos | Pos |                    |
| 336        | 1     | M   | 12               | OD          | D    | 80               | 8             | 0             | 7                | 0              | 0               | No                  | No  |           |      | Pos | Pos |                    |
| 337        | 1     | F   | 26               | OS          | D    | 29               | 6             | 0             | 8                | 0              | 0               | Yes                 | No  |           |      | Neg | Neg | 29                 |
| 338        | 2     | F   | 6                | OD          | D    | 41               | 3             | 0             |                  |                |                 |                     | No  |           |      | Neg | Neg | 41                 |
| 339        | 1     | M   | 27               | OD          | D    | 76               | 5             | 0             | 8                | 0              | 0               | No                  | No  |           |      | Pos | Pos |                    |
| 340        | 2     | M   | 10               | OD          | D    | 86               | 0             | 4             |                  |                |                 |                     | No  |           |      | Pos | Pos |                    |
| 341        | 2     | M   | 9                | OD          | D    | 6                | 6             | 0             |                  |                |                 |                     | Yes | 6         | N/A  | Pos | Pos |                    |
| 342        | 2     | M   | 19               | OD          | D    | 2                | 2             | 0             |                  |                |                 |                     | No  |           |      | Pos | Pos |                    |
| 343        | 2     | M   | 11               | OD          | D    | 2                | 2             | 0             |                  |                |                 |                     | No  |           |      | Pos | Pos |                    |
| 344        | 1     | M   | 27               | OD          | D    | 73               | 5             | 0             | 6                | 0              | 0               | Yes                 | Yes | 41        | pT2b | Pos | Pos |                    |
| 345        | 2     | F   | 9                | OD          | D    | 2                | 3             | 0             |                  |                |                 |                     | No  |           |      | Pos | Pos |                    |
| 346        | 1     | M   | 8                | OD          | D    | 76               | 4             | 0             | 4                | 0              | 0               | Yes                 | No  |           |      | Pos | Pos |                    |
| 347        | 1     | M   | 13               | OD          | D    | 75               | 4             | 0             | 4                | 0              | 0               | Yes                 | No  |           |      | Pos | Pos |                    |
| 348        | 2     | M   | 8                | OD          | D    | 3                | 1             | 1             |                  |                |                 |                     | No  |           |      | Pos | Pos |                    |
| 349        | 1     | F   | 14               | OD          | D    | 73               | 3             | 0             | 3                | 0              | 0               | No                  | No  |           |      | Pos | Pos |                    |
| 350        | 2     | F   | 7                | OD          | D    | 18               | 6             | 0             |                  |                |                 |                     | No  |           |      | Pos | Pos |                    |
| 351        | 1     | M   | 3                | OD          | D    | 78               | 3             | 0             | 3                | 1              | 2               | No                  | No  |           |      | Pos | Pos |                    |
| 352        | 2     | M   | 19               | OD          | D    | 4                | 5             | 0             |                  |                |                 |                     | No  |           |      | Pos | Pos |                    |
| 353        | 2     | M   | 25               | OD          | D    | 79               | 6             | 3             |                  |                |                 |                     | Yes | 28        | N/A  | Pos | Pos |                    |
| 354        | 2     | F   | 13               | OD          | D    | 78               | 4             | 0             |                  |                |                 |                     | No  |           |      | Pos | Pos |                    |
| 355        | 2     | M   | 22               | OD          | D    | 63               | 5             | 1             |                  |                |                 |                     | No  |           |      | Pos | Pos |                    |
| 356        | 2     | M   | 1                | OD          | D    | 3                | 3             | 0             |                  |                |                 |                     | No  |           |      | Pos | Pos |                    |
| 357        | 2     | M   | 10               | OD          | D    | 20               | 2             | 0             |                  |                |                 |                     | No  |           |      | Neg | Neg | 20                 |
| 358        | 2     | F   | 13               | OD          | D    | 3                | 3             | 0             |                  |                |                 |                     | No  |           |      | Pos | Pos |                    |
| 359        | 2     | F   | 12               | OD          | D    | 76               | 6             | 0             |                  |                |                 |                     | No  |           |      | Pos | Pos |                    |
| 360        | 2     | F   | 24               | OD          | D    | 62               | 4             | 0             |                  |                |                 |                     | Yes | 7         | pT2b | Pos | Pos |                    |

# Safety of Tylectomy in Salvage of Eyes Affected by Retinoblastoma

Raw data, Table S2

| Patient ID | Group | Sex | Age at Dx months | Studied Eye | IIRC | Follow-up Months | Pre-Tyl IVC # | Pre-Tyl IAC # | Dx to Tyl months | Post-Tyl IVC # | Post-Tyl Ivtc # | Post-Tyl Recurrence | Enu | Dx to Enu | pTNM | OS  | DDS | Dx to Death months |
|------------|-------|-----|------------------|-------------|------|------------------|---------------|---------------|------------------|----------------|-----------------|---------------------|-----|-----------|------|-----|-----|--------------------|
| 361        | 2     | M   | 19               | OD          | D    | 2                | 2             | 0             |                  |                |                 |                     | No  |           |      | Pos | Pos |                    |
| 362        | 2     | F   | 4                | OD          | D    | 69               | 6             | 0             |                  |                |                 |                     | No  |           |      | Pos | Pos |                    |
| 363        | 2     | M   | 25               | OD          | D    | 10               | 3             | 1             |                  |                |                 |                     | No  |           |      | Neg | Neg | 10                 |
| 364        | 1     | M   | 16               | OD          | D    | 67               | 3             | 0             | 3                | 0              | 0               | No                  | No  |           |      | Pos | Pos |                    |
| 365        | 2     | F   | 6                | OD          | D    | 8                | 6             | 0             |                  |                |                 |                     | No  |           |      | Pos | Pos |                    |
| 366        | 2     | M   | 20               | OS          | D    | 8                | 4             | 0             |                  |                |                 |                     | No  |           |      | Neg | Neg | 8                  |
| 367        | 1     | F   | 17               | OD          | D    | 64               | 5             | 1             | 5                | 0              | 0               | No                  | No  |           |      | Pos | Pos |                    |
| 368        | 2     | M   | 3                | OD          | D    | 4                | 4             | 0             |                  |                |                 |                     | No  |           |      | Pos | Pos |                    |
| 369        | 2     | F   | 14               | OD          | D    | 33               | 9             | 0             |                  |                |                 |                     | No  |           |      | Pos | Pos |                    |
| 370        | 2     | M   | 9                | OD          | D    | 2                | 2             | 0             |                  |                |                 |                     | No  |           |      | Pos | Pos |                    |
| 371        | 2     | F   | 5                | OD          | D    | 62               | 1             | 3             |                  |                |                 |                     | Yes | 19        | N/A  | Pos | Pos |                    |
| 372        | 1     | F   | 18               | OD          | D    | 63               | 5             | 0             | 5                | 0              | 0               | No                  | No  |           |      | Pos | Pos |                    |
| 373        | 1     | M   | 25               | OS          | D    | 67               | 5             | 0             | 13               | 7              | 3               | No                  | No  |           |      | Pos | Pos |                    |
| 374        | 2     | F   | 13               | OD          | D    | 2                | 2             | 0             |                  |                |                 |                     | No  |           |      | Pos | Pos |                    |
| 375        | 1     | F   | 2                | OD          | D    | 82               | 4             | 3             | 18               | 1              | 1               | Yes                 | Yes | 34        | pT3a | Pos | Pos |                    |
| 376        | 1     | M   | 11               | OD          | D    | 68               | 2             | 0             | 3                | 0              | 0               | No                  | No  |           |      | Pos | Pos |                    |
| 377        | 1     | M   | 23               | OD          | D    | 64               | 3             | 0             | 2                | 0              | 0               | No                  | No  |           |      | Pos | Pos |                    |
| 378        | 2     | F   | 4                | OD          | D    | 30               | 1             | 0             |                  |                |                 |                     | No  |           |      | Neg | Neg | 30                 |
| 379        | 1     | F   | 13               | OD          | D    | 56               | 5             | 0             | 5                | 0              | 0               | No                  | No  |           |      | Pos | Pos |                    |
| 380        | 1     | F   | 35               | OD          | D    | 60               | 1             | 1             | 2                | 2              | 0               | Yes                 | Yes | 10        | pT3b | Pos | Pos |                    |
| 381        | 2     | F   | 2                | OD          | D    | 23               | 2             | 0             |                  |                |                 |                     | No  |           |      | Neg | Neg | 23                 |
| 382        | 2     | M   | 1                | OD          | D    | 101              | 8             | 0             |                  |                |                 |                     | Yes | 9         | pT1  | Pos | Pos |                    |
| 383        | 1     | M   | 8                | OD          | D    | 90               | 6             | 0             | 12               | 0              | 0               | Yes                 | Yes | 23        | pT1  | Pos | Pos |                    |
| 384        | 2     | F   | 4                | OD          | D    | 81               | 3             | 1             |                  |                |                 |                     | No  |           |      | Pos | Pos |                    |
| 385        | 2     | F   | 3                | OD          | D    | 8                | 4             | 0             |                  |                |                 |                     | No  |           |      | Pos | Pos |                    |
| 386        | 2     | M   | 6                | OD          | D    | 93               | 6             | 0             |                  |                |                 |                     | Yes | 12        | pT1  | Pos | Pos |                    |
| 387        | 2     | M   | 31               | OD          | D    | 97               | 2             | 0             |                  |                |                 |                     | Yes | 1         | pT1  | Pos | Pos |                    |
| 388        | 1     | M   | 14               | OD          | D    | 78               | 6             | 2             | 24               | 0              | 0               | Yes                 | Yes | 25        | N/A  | Pos | Pos |                    |
| 389        | 2     | F   | 2                | OD          | D    | 82               | 5             | 0             |                  |                |                 |                     | Yes | 41        | pT3a | Pos | Pos |                    |
| 390        | 1     | M   | 5                | OD          | D    | 76               | 6             | 0             | 9                | 0              | 4               | Yes                 | No  |           |      | Pos | Pos |                    |
| 391        | 1     | M   | 18               | OD          | D    | 87               | 2             | 3             | 6                | 0              | 1               | No                  | No  |           |      | Pos | Pos |                    |
| 392        | 1     | M   | 4                | OD          | D    | 79               | 4             | 3             | 7                | 0              | 0               | No                  | No  |           |      | Pos | Pos |                    |
| 393        | 1     | M   | 3                | OD          | D    | 73               | 6             | 0             | 8                | 0              | 2               | No                  | No  |           |      | Pos | Pos |                    |
| 394        | 1     | M   | 5                | OD          | D    | 74               | 6             | 0             | 6                | 0              | 0               | Yes                 | Yes | 50        | pT1  | Pos | Pos |                    |
| 395        | 1     | M   | 7                | OD          | D    | 67               | 3             | 0             | 3                | 0              | 0               | No                  | No  |           |      | Pos | Pos |                    |
| 396        | 1     | F   | 8                | OD          | D    | 79               | 3             | 0             | 3                | 0              | 0               | Yes                 | No  |           |      | Pos | Pos |                    |
| 397        | 2     | F   | 13               | OD          | D    | 65               | 3             | 0             |                  |                |                 |                     | Yes | 3         | pT1  | Pos | Pos |                    |
| 398        | 1     | F   | 22               | OS          | B    | 63               | 3             | 0             | 3                | 0              | 0               | No                  | No  |           |      | Pos | Pos |                    |
| 399        | 2     | F   | 14               | OD          | D    | 64               | 3             | 0             |                  |                |                 |                     | Yes | 3         | pT1  | Pos | Pos |                    |
| 400        | 1     | F   | 15               | OD          | D    | 2                | 2             | 0             | 2                | 0              | 0               | No                  | No  |           |      | Pos | Pos |                    |
| 401        | 2     | M   | 3                | OD          | D    | 60               | 9             | 0             |                  |                |                 |                     | No  |           |      | Pos | Pos |                    |
| 402        | 2     | M   | 4                | OD          | D    | 2                | 2             | 0             |                  |                |                 |                     | No  |           |      | Pos | Pos |                    |
| 403        | 2     | M   | 4                | OD          | D    | 61               | 3             | 3             |                  |                |                 |                     | No  |           |      | Pos | Pos |                    |
| 404        | 2     | F   | 31               | OS          | B    | 57               | 3             | 0             |                  |                |                 |                     | No  |           |      | Pos | Pos |                    |
| 405        | 2     | F   | 30               | OS          | A    | 93               | 0             | 0             |                  |                |                 |                     | No  | 0         | pT1  | Pos | Pos |                    |
| 406        | 2     | F   | 15               | OD          | D    | 97               | 5             | 0             |                  |                |                 |                     | Yes | 12        | pT1  | Pos | Pos |                    |
| 407        | 2     | F   | 7                | OS          | A    | 82               | 0             | 0             |                  |                |                 |                     | No  | 0         | pT1  | Pos | Pos |                    |
| 408        | 1     | M   | 12               | OD          | D    | 70               | 2             | 0             | 3                | 0              | 0               | No                  | No  |           |      | Pos | Pos |                    |
| 409        | 2     | F   | 48               | OD          | D    | 75               | 3             | 0             |                  |                |                 |                     | Yes | 3         | pT1  | Pos | Pos |                    |
| 410        | 2     | M   | 16               | OD          | D    | 9                | 5             | 3             |                  |                |                 |                     | No  |           |      | Pos | Pos |                    |
| 411        | 2     | F   | 44               | OS          | A    | 54               | 0             | 0             |                  |                |                 |                     | No  | 0         | N/A  | Pos | Pos |                    |
| 412        | 2     | M   | 16               | OD          | D    | 12               | 12            | 0             |                  |                |                 |                     | No  |           |      | Pos | Pos |                    |
| 413        | 2     | F   | 5                | OD          | D    | 62               | 4             | 1             |                  |                |                 |                     | No  |           |      | Pos | Pos |                    |
| 414        | 2     | F   | 12               | OD          | D    | 11               | 1             | 2             |                  |                |                 |                     | No  |           |      | Pos | Pos |                    |
| 415        | 3     | F   | 39               | OD          | D    | 102              | 0             | 0             |                  |                |                 |                     | Yes | 0         | pT1  | Pos | Pos |                    |
| 416        | 2     | F   | 21               | OS          | D    | 100              | 8             | 2             |                  |                |                 |                     | Yes | 11        | pT1  | Pos | Pos |                    |
| 417        | 3     | M   | 13               | OS          | D    | 102              | 0             | 0             |                  |                |                 |                     | Yes | 1         | pT1  | Pos | Pos |                    |
| 418        | 1     | M   | 25               | OS          | D    | 100              | 7             | 0             | 16               | 0              | 0               | No                  | No  |           |      | Pos | Pos |                    |
| 419        | 2     | M   | 13               | OS          | D    | 91               | 4             | 1             |                  |                |                 |                     | No  |           |      | Pos | Pos |                    |
| 420        | 3     | F   | 28               | OD          | D    | 90               | 0             | 0             |                  |                |                 |                     | Yes | 0         | pT1  | Pos | Pos |                    |
| 421        | 3     | M   | 34               | OD          | D    | 96               | 0             | 0             |                  |                |                 |                     | Yes | 0         | pT1  | Pos | Pos |                    |
| 422        | 3     | M   | 12               | OD          | D    | 67               | 0             | 0             |                  |                |                 |                     | Yes | 0         | pT1  | Pos | Pos |                    |
| 423        | 2     | F   | 17               | OS          | D    | 86               | 2             | 3             |                  |                |                 |                     | No  |           |      | Pos | Pos |                    |
| 424        | 2     | M   | 22               | OD          | D    | 6                | 1             | 3             |                  |                |                 |                     | No  |           |      | Pos | Pos |                    |
| 425        | 1     | M   | 40               | OS          | D    | 91               | 0             | 3             | 19               | 0              | 2               | Yes                 | No  |           |      | Pos | Pos |                    |
| 426        | 2     | M   | 32               | OD          | D    | 94               | 5             | 1             |                  |                |                 |                     | No  |           |      | Pos | Pos |                    |
| 427        | 3     | M   | 25               | OD          | D    | 87               | 0             | 0             |                  |                |                 |                     | Yes | 0         | pT1  | Pos | Pos |                    |
| 428        | 3     | M   | 32               | OD          | D    | 95               | 0             | 0             |                  |                |                 |                     | Yes | 0         | pT1  | Pos | Pos |                    |
| 429        | 2     | M   | 34               | OD          | D    | 100              | 3             | 0             |                  |                |                 |                     | Yes | 3         | pT1  | Pos | Pos |                    |
| 430        | 2     | F   | 25               | OD          | D    | 95               | 4             | 0             |                  |                |                 |                     | Yes | 4         | pT1  | Pos | Pos |                    |
| 431        | 3     | F   | 37               | OD          | D    | 98               | 0             | 0             |                  |                |                 |                     | Yes | 0         | pT1  | Pos | Pos |                    |
| 432        | 3     | F   | 31               | OD          | D    | 0                | 0             | 0             |                  |                |                 |                     | Yes | 0         | pT1  | Pos | Pos |                    |

# Safety of Tylectomy in Salvage of Eyes Affected by Retinoblastoma

Raw data, Table S2

| Patient ID | Group | Sex | Age at Dx months | Studied Eye | IIRC | Follow-up Months | Pre-Tyl IVC # | Pre-Tyl IAC # | Dx to Tyl months | Post-Tyl IVC # | Post-Tyl Ivtc # | Post-Tyl Recurrence | Enu | Dx to Enu | pTNM | OS  | DDS | Dx to Death months |
|------------|-------|-----|------------------|-------------|------|------------------|---------------|---------------|------------------|----------------|-----------------|---------------------|-----|-----------|------|-----|-----|--------------------|
| 433        | 3     | M   | 54               | OS          | D    | 87               | 0             | 0             |                  |                |                 |                     | Yes | 0         | pT1  | Pos | Pos |                    |
| 434        | 2     | F   | 40               | OS          | D    | 100              | 3             | 0             |                  |                |                 |                     | No  |           |      | Pos | Pos |                    |
| 435        | 2     | F   | 3                | OS          | D    | 100              | 2             | 2             |                  |                |                 |                     | No  |           |      | Pos | Pos |                    |
| 436        | 3     | M   | 34               | OD          | D    | 100              | 0             | 0             |                  |                |                 |                     | Yes | 0         | pT1  | Pos | Pos |                    |
| 437        | 3     | M   | 20               | OS          | D    | 89               | 0             | 0             |                  |                |                 |                     | Yes | 0         | pT1  | Pos | Pos |                    |
| 438        | 2     | F   | 19               | OD          | D    | 92               | 1             | 0             |                  |                |                 |                     | Yes | 0         | pT1  | Pos | Pos |                    |
| 439        | 2     | F   | 9                | OD          | D    | 94               | 6             | 0             |                  |                |                 |                     | Yes | 11        | pT1  | Pos | Pos |                    |
| 440        | 3     | M   | 18               | OD          | D    | 89               | 0             | 0             |                  |                |                 |                     | Yes | 0         | pT1  | Pos | Pos |                    |
| 441        | 3     | M   | 45               | OS          | D    | 99               | 0             | 0             |                  |                |                 |                     | Yes | 0         | pT1  | Pos | Pos |                    |
| 442        | 3     | F   | 12               | OS          | D    | 99               | 0             | 0             |                  |                |                 |                     | Yes | 0         | pT3a | Pos | Pos |                    |
| 443        | 2     | M   | 3                | OD          | D    | 86               | 3             | 0             |                  |                |                 |                     | Yes | 3         | pT1  | Pos | Pos |                    |
| 444        | 2     | F   | 39               | OD          | D    | 86               | 6             | 0             |                  |                |                 |                     | Yes | 7         | pT1  | Pos | Pos |                    |
| 445        | 3     | F   | 6                | OS          | D    | 86               | 0             | 0             |                  |                |                 |                     | Yes | 0         | pT2a | Pos | Pos |                    |
| 446        | 3     | M   | 12               | OD          | D    | 99               | 0             | 0             |                  |                |                 |                     | Yes | 0         | pT1  | Pos | Pos |                    |
| 447        | 1     | F   | 29               | OS          | D    | 94               | 3             | 2             | 7                | 0              | 0               | No                  | No  |           |      | Pos | Pos |                    |
| 448        | 3     | M   | 18               | OD          | D    | 94               | 0             | 0             |                  |                |                 |                     | Yes | 0         | pT1  | Pos | Pos |                    |
| 449        | 3     | F   | 7                | OS          | D    | 84               | 0             | 0             |                  |                |                 |                     | Yes | 0         | pT1  | Pos | Pos |                    |
| 450        | 2     | M   | 34               | OD          | D    | 96               | 4             | 0             |                  |                |                 |                     | Yes | 4         | pT1  | Pos | Pos |                    |
| 451        | 1     | F   | 24               | OD          | D    | 93               | 4             | 1             | 9                | 0              | 3               | No                  | No  |           |      | Pos | Pos |                    |
| 452        | 3     | M   | 65               | OS          | D    | 85               | 0             | 0             |                  |                |                 |                     | Yes | 0         | pT3b | Pos | Pos |                    |
| 453        | 1     | M   | 21               | OS          | D    | 66               | 0             | 3             | 14               | 0              | 1               | Yes                 | Yes | 25        | N/A  | Pos | Pos |                    |
| 454        | 2     | M   | 32               | OS          | D    | 11               | 2             | 2             |                  |                |                 |                     | Yes | 9         | pT4  | Neg | Neg | 11                 |
| 455        | 2     | M   | 27               | OS          | D    | 98               | 6             | 0             |                  |                |                 |                     | Yes | 6         | pT1  | Pos | Pos |                    |
| 456        | 2     | F   | 8                | OS          | D    | 87               | 4             | 0             |                  |                |                 |                     | No  |           |      | Pos | Pos |                    |
| 457        | 2     | F   | 44               | OD          | D    | 98               | 4             | 0             |                  |                |                 |                     | Yes | 9         | pT1  | Pos | Pos |                    |
| 458        | 2     | M   | 4                | OS          | D    | 60               | 5             | 0             |                  |                |                 |                     | Yes | 10        | pT3a | Pos | Pos |                    |
| 459        | 2     | M   | 22               | OD          | D    | 84               | 1             | 0             |                  |                |                 |                     | Yes | 1         | pT3b | Pos | Pos |                    |
| 460        | 2     | F   | 46               | OD          | D    | 94               | 2             | 0             |                  |                |                 |                     | Yes | 2         | pT1  | Pos | Pos |                    |
| 461        | 2     | M   | 2                | OD          | D    | 81               | 0             | 2             |                  |                |                 |                     | No  |           |      | Pos | Pos |                    |
| 462        | 2     | M   | 22               | OS          | D    | 98               | 2             | 0             |                  |                |                 |                     | Yes | 2         | pT1  | Pos | Pos |                    |
| 463        | 2     | M   | 23               | OS          | D    | 75               | 5             | 0             |                  |                |                 |                     | Yes | 5         | pT1  | Pos | Pos |                    |
| 464        | 3     | F   | 14               | OD          | D    | 81               | 0             | 0             |                  |                |                 |                     | Yes | 0         | pT1  | Pos | Pos |                    |
| 465        | 3     | F   | 26               | OD          | D    | 97               | 0             | 0             |                  |                |                 |                     | Yes | 0         | pT1  | Pos | Pos |                    |
| 466        | 2     | F   | 28               | OS          | D    | 89               | 1             | 0             |                  |                |                 |                     | Yes | 1         | pT1  | Pos | Pos |                    |
| 467        | 2     | M   | 20               | OS          | D    | 87               | 2             | 0             |                  |                |                 |                     | Yes | 3         | pT1  | Pos | Pos |                    |
| 468        | 3     | M   | 22               | OD          | D    | 92               | 0             | 0             |                  |                |                 |                     | Yes | 0         | pT1  | Pos | Pos |                    |
| 469        | 2     | F   | 27               | OD          | D    | 92               | 6             | 0             |                  |                |                 |                     | Yes | 5         | pT1  | Pos | Pos |                    |
| 470        | 2     | F   | 43               | OD          | D    | 97               | 6             | 2             |                  |                |                 |                     | Yes | 9         | pT1  | Pos | Pos |                    |
| 471        | 3     | M   | 30               | OS          | D    | 95               | 0             | 0             |                  |                |                 |                     | Yes | 0         | pT1  | Pos | Pos |                    |
| 472        | 2     | M   | 35               | OD          | D    | 86               | 6             | 0             |                  |                |                 |                     | Yes | 6         | pT2b | Pos | Pos |                    |
| 473        | 1     | M   | 96               | OS          | D    | 85               | 6             | 2             | 8                | 4              | 0               | Yes                 | Yes | 22        | pT1  | Pos | Pos |                    |
| 474        | 2     | M   | 3                | OS          | D    | 82               | 3             | 0             |                  |                |                 |                     | Yes | 4         | pT1  | Pos | Pos |                    |
| 475        | 2     | M   | 26               | OD          | D    | 86               | 1             | 0             |                  |                |                 |                     | Yes | 1         | pT1  | Pos | Pos |                    |
| 476        | 1     | F   | 36               | OS          | D    | 85               | 6             | 0             | 10               | 0              | 1               | No                  | No  |           |      | Pos | Pos |                    |
| 477        | 3     | F   | 43               | OS          | D    | 96               | 0             | 0             |                  |                |                 |                     | Yes | 0         | pT1  | Pos | Pos |                    |
| 478        | 3     | F   | 5                | OD          | D    | 90               | 0             | 0             |                  |                |                 |                     | Yes | 0         | pT1  | Pos | Pos |                    |
| 479        | 2     | F   | 2                | OD          | D    | 82               | 5             | 0             |                  |                |                 |                     | Yes | 4         | pT1  | Pos | Pos |                    |
| 480        | 1     | F   | 73               | OS          | D    | 90               | 3             | 0             | 4                | 0              | 0               | No                  | No  |           |      | Pos | Pos |                    |
| 481        | 2     | M   | 17               | OS          | D    | 82               | 4             | 0             |                  |                |                 |                     | Yes | 4         | pT1  | Pos | Pos |                    |
| 482        | 1     | F   | 6                | OD          | D    | 84               | 6             | 0             | 13               | 0              | 0               | No                  | No  |           |      | Pos | Pos |                    |
| 483        | 1     | M   | 68               | OS          | D    | 95               | 2             | 0             | 5                | 0              | 4               | No                  | No  |           |      | Pos | Pos |                    |
| 484        | 2     | M   | 16               | OS          | D    | 82               | 4             | 0             |                  |                |                 |                     | Yes | 8         | pT1  | Pos | Pos |                    |
| 485        | 2     | M   | 23               | OD          | D    | 16               | 1             | 0             |                  |                |                 |                     | Yes | 1         | pT1  | Pos | Pos |                    |
| 486        | 2     | M   | 21               | OS          | D    | 88               | 3             | 1             |                  |                |                 |                     | Yes | 5         | pT1  | Pos | Pos |                    |
| 487        | 2     | F   | 2                | OD          | D    | 15               | 0             | 2             |                  |                |                 |                     | Yes | 15        | N/A  | Pos | Pos |                    |
| 488        | 2     | F   | 32               | OS          | D    | 52               | 0             | 4             |                  |                |                 |                     | No  |           |      | Pos | Pos |                    |
| 489        | 1     | F   | 4                | OD          | D    | 92               | 3             | 2             | 9                | 0              | 0               | Yes                 | No  |           |      | Pos | Pos |                    |
| 490        | 2     | M   | 21               | OD          | D    | 93               | 2             | 0             |                  |                |                 |                     | Yes | 2         | pT1  | Pos | Pos |                    |
| 491        | 1     | M   | 20               | OS          | D    | 84               | 5             | 0             | 6                | 0              | 2               | No                  | No  |           |      | Pos | Pos |                    |
| 492        | 2     | F   | 22               | OS          | D    | 5                | 5             | 0             |                  |                |                 |                     | Yes | 5         | N/A  | Pos | Pos |                    |
| 493        | 3     | M   | 22               | OD          | D    | 83               | 0             | 0             |                  |                |                 |                     | Yes | 1         | pT1  | Pos | Pos |                    |
| 494        | 3     | F   | 25               | OD          | D    | 94               | 0             | 0             |                  |                |                 |                     | Yes | 0         | pt1  | Pos | Pos |                    |
| 495        | 3     | M   | 10               | OD          | D    | 77               | 0             | 0             |                  |                |                 |                     | Yes | 1         | pT3c | Pos | Pos |                    |
| 496        | 2     | M   | 45               | OS          | D    | 16               | 7             | 0             |                  |                |                 |                     | Yes | 9         | N/A  | Pos | Pos |                    |
| 497        | 1     | F   | 4                | OS          | D    | 87               | 0             | 2             | 8                | 0              | 0               | No                  | No  |           |      | Pos | Pos |                    |
| 498        | 3     | M   | 32               | OD          | D    | 78               | 0             | 0             |                  |                |                 |                     | Yes | 0         | pT1  | Pos | Pos |                    |
| 499        | 3     | F   | 23               | OD          | D    | 88               | 0             | 0             |                  |                |                 |                     | Yes | 0         | pT1  | Pos | Pos |                    |
| 500        | 3     | F   | 21               | OD          | D    | 70               | 0             | 0             |                  |                |                 |                     | Yes | 0         | pT1  | Pos | Pos |                    |
| 501        | 3     | M   | 33               | OS          | D    | 93               | 0             | 0             |                  |                |                 |                     | Yes | 0         | pT1  | Pos | Pos |                    |
| 502        | 2     | M   | 22               | OD          | D    | 88               | 2             | 0             |                  |                |                 |                     | Yes | 2         | pT1  | Pos | Pos |                    |
| 503        | 1     | F   | 8                | OS          | D    | 83               | 4             | 0             | 8                | 0              | 1               | No                  | No  |           |      | Pos | Pos |                    |
| 504        | 3     | F   | 25               | OD          | D    | 59               | 0             | 0             |                  |                |                 |                     | Yes | 0         | N/A  | Pos | Pos |                    |

# Safety of Tylectomy in Salvage of Eyes Affected by Retinoblastoma

Raw data, Table S2

| Patient ID | Group | Sex | Age at Dx months | Studied Eye | IIRC | Follow-up Months | Pre-Tyl IVC # | Pre-Tyl IAC # | Dx to Tyl months | Post-Tyl IVC # | Post-Tyl Ivtc # | Post-Tyl Recurrence | Enu | Dx to Enu | pTNM | OS  | DDS | Dx to Death months |
|------------|-------|-----|------------------|-------------|------|------------------|---------------|---------------|------------------|----------------|-----------------|---------------------|-----|-----------|------|-----|-----|--------------------|
| 505        | 1     | F   | 24               | OD          | D    | 85               | 6             | 0             | 5                | 1              | 2               | No                  | No  |           |      | Pos | Pos |                    |
| 506        | 2     | F   | 22               | OD          | D    | 2                | 3             | 0             |                  |                |                 |                     | No  |           |      | Pos | Pos |                    |
| 507        | 3     | F   | 13               | OD          | D    | 93               | 0             | 0             |                  |                |                 |                     | Yes | 0         | pT1  | Pos | Pos |                    |
| 508        | 2     | F   | 20               | OS          | D    | 9                | 1             | 0             |                  |                |                 |                     | Yes | 1         | pT1  | Pos | Pos |                    |
| 509        | 3     | M   | 7                | OD          | D    | 79               | 0             | 0             |                  |                |                 |                     | Yes | 0         | N/A  | Pos | Pos |                    |
| 510        | 3     | F   | 22               | OS          | D    | 82               | 0             | 0             |                  |                |                 |                     | Yes | 0         | pT1  | Pos | Pos |                    |
| 511        | 2     | F   | 32               | OS          | D    | 82               | 1             | 0             |                  |                |                 |                     | Yes | 1         | pT1  | Pos | Pos |                    |
| 512        | 3     | M   | 9                | OD          | D    | 92               | 0             | 0             |                  |                |                 |                     | Yes | 0         | pT1  | Pos | Pos |                    |
| 513        | 3     | M   | 23               | OS          | D    | 81               | 0             | 0             |                  |                |                 |                     | Yes | 0         | pT2a | Pos | Pos |                    |
| 514        | 2     | F   | 30               | OS          | D    | 81               | 2             | 0             |                  |                |                 |                     | Yes | 4         | pT1  | Pos | Pos |                    |
| 515        | 1     | M   | 11               | OD          | D    | 76               | 6             | 0             | 6                | 0              | 0               | Yes                 | No  |           |      | Pos | Pos |                    |
| 516        | 1     | M   | 5                | OD          | D    | 76               | 6             | 0             | 8                | 0              | 0               | Yes                 | Yes | 16        | pT4  | Pos | Pos |                    |
| 517        | 3     | M   | 24               | OS          | D    | 84               | 0             | 0             |                  |                |                 |                     | Yes | 0         | pT1  | Pos | Pos |                    |
| 518        | 3     | F   | 24               | OS          | D    | 92               | 0             | 0             |                  |                |                 |                     | Yes | 0         | pT1  | Pos | Pos |                    |
| 519        | 3     | M   | 35               | OD          | D    | 76               | 0             | 0             |                  |                |                 |                     | Yes | 0         | pT1  | Pos | Pos |                    |
| 520        | 3     | M   | 18               | OD          | D    | 92               | 0             | 0             |                  |                |                 |                     | Yes | 0         | pT1  | Pos | Pos |                    |
| 521        | 3     | M   | 24               | OS          | D    | 79               | 0             | 0             |                  |                |                 |                     | Yes | 0         | pT1  | Pos | Pos |                    |
| 522        | 3     | F   | 42               | OD          | D    | 81               | 0             | 0             |                  |                |                 |                     | Yes | 0         | pT1  | Pos | Pos |                    |
| 523        | 3     | F   | 11               | OS          | D    | 36               | 0             | 0             |                  |                |                 |                     | Yes | 0         | pT1  | Pos | Pos |                    |
| 524        | 2     | M   | 3                | OD          | D    | 92               | 4             | 0             |                  |                |                 |                     | Yes | 4         | pT2a | Pos | Pos |                    |
| 525        | 2     | M   | 21               | OD          | D    | 80               | 2             | 0             |                  |                |                 |                     | Yes | 3         | pT1  | Pos | Pos |                    |
| 526        | 3     | M   | 89               | OD          | D    | 84               | 0             | 0             |                  |                |                 |                     | Yes | 0         | pT1  | Pos | Pos |                    |
| 527        | 2     | M   | 21               | OS          | D    | 91               | 1             | 0             |                  |                |                 |                     | Yes | 1         | pT1  | Pos | Pos |                    |
| 528        | 2     | F   | 7                | OD          | D    | 91               | 2             | 3             |                  |                |                 |                     | No  |           |      | Pos | Pos |                    |
| 529        | 2     | M   | 2                | OS          | D    | 90               | 5             | 0             |                  |                |                 |                     | Yes | 5         | pT2b | Pos | Pos |                    |
| 530        | 1     | F   | 47               | OS          | D    | 74               | 0             | 4             | 9                | 0              | 1               | No                  | No  |           |      | Pos | Pos |                    |
| 531        | 2     | F   | 15               | OS          | D    | 7                | 2             | 2             |                  |                |                 |                     | No  |           |      | Pos | Pos |                    |
| 532        | 2     | F   | 10               | OD          | D    | 83               | 1             | 0             |                  |                |                 |                     | Yes | 1         | pT1  | Pos | Pos |                    |
| 533        | 3     | F   | 5                | OD          | D    | 85               | 0             | 0             |                  |                |                 |                     | Yes | 0         | N/A  | Pos | Pos |                    |
| 534        | 1     | M   | 7                | OS          | D    | 80               | 3             | 0             | 6                | 0              | 0               | No                  | No  |           |      | Pos | Pos |                    |
| 535        | 1     | M   | 5                | OS          | D    | 77               | 4             | 0             | 6                | 0              | 1               | No                  | No  |           |      | Pos | Pos |                    |
| 536        | 3     | M   | 35               | OD          | D    | 90               | 0             | 0             |                  |                |                 |                     | Yes | 0         | pT1  | Pos | Pos |                    |
| 537        | 1     | F   | 23               | OS          | D    | 37               | 1             | 3             | 7                | 0              | 0               | Yes                 | No  |           |      | Neg | Neg | 37                 |
| 538        | 2     | F   | 17               | OD          | D    | 19               | 3             | 0             |                  |                |                 |                     | Yes | 3         | pT1  | Pos | Pos |                    |
| 539        | 1     | F   | 6                | OD          | D    | 78               | 5             | 0             | 6                | 0              | 1               | Yes                 | No  |           |      | Pos | Pos |                    |
| 540        | 2     | F   | 17               | OD          | D    | 16               | 4             | 0             |                  |                |                 |                     | Yes | 14        | N/A  | Pos | Pos |                    |
| 541        | 3     | F   | 22               | OD          | D    | 90               | 0             | 0             |                  |                |                 |                     | Yes | 0         | pT1  | Pos | Pos |                    |
| 542        | 2     | M   | 33               | OS          | D    | 56               | 1             | 0             |                  |                |                 |                     | Yes | 1         | pT1  | Pos | Pos |                    |
| 543        | 2     | M   | 3                | OD          | D    | 90               | 2             | 0             |                  |                |                 |                     | Yes | 2         | pT1  | Pos | Pos |                    |
| 544        | 2     | F   | 31               | OD          | D    | 7                | 4             | 3             |                  |                |                 |                     | No  |           |      | Pos | Pos |                    |
| 545        | 1     | M   | 29               | OD          | D    | 81               | 2             | 0             | 2                | 0              | 0               | No                  | No  |           |      | Pos | Pos |                    |
| 546        | 1     | F   | 12               | OS          | D    | 80               | 4             | 0             | 5                | 0              | 1               | Yes                 | No  |           |      | Pos | Pos |                    |
| 547        | 3     | M   | 35               | OD          | D    | 76               | 0             | 0             |                  |                |                 |                     | Yes | 0         | pT1  | Pos | Pos |                    |
| 548        | 1     | M   | 18               | OS          | D    | 76               | 6             | 0             | 6                | 0              | 1               | No                  | No  |           |      | Pos | Pos |                    |
| 549        | 3     | M   | 27               | OS          | D    | 52               | 0             | 0             |                  |                |                 |                     | Yes | 0         | pT1  | Pos | Pos |                    |
| 550        | 3     | M   | 30               | OS          | D    | 89               | 0             | 0             |                  |                |                 |                     | Yes | 0         | pT1  | Pos | Pos |                    |
| 551        | 3     | M   | 11               | OD          | D    | 84               | 0             | 0             |                  |                |                 |                     | Yes | 0         | pT1  | Pos | Pos |                    |
| 552        | 3     | M   | 28               | OS          | D    | 90               | 0             | 0             |                  |                |                 |                     | Yes | 0         | pT3a | Pos | Pos |                    |
| 553        | 3     | F   | 29               | OS          | D    | 89               | 0             | 0             |                  |                |                 |                     | Yes | 0         | pT1  | Pos | Pos |                    |
| 554        | 2     | M   | 23               | OS          | D    | 72               | 1             | 0             |                  |                |                 |                     | Yes | 1         | pT1  | Pos | Pos |                    |
| 555        | 3     | M   | 22               | OD          | D    | 82               | 0             | 0             |                  |                |                 |                     | Yes | 0         | pT1  | Pos | Pos |                    |
| 556        | 3     | F   | 34               | OD          | D    | 81               | 0             | 0             |                  |                |                 |                     | Yes | 0         | pT3b | Pos | Pos |                    |
| 557        | 2     | F   | 23               | OS          | D    | 75               | 3             | 0             |                  |                |                 |                     | Yes | 3         | pT1  | Pos | Pos |                    |
| 558        | 3     | M   | 25               | OD          | D    | 7                | 0             | 0             |                  |                |                 |                     | Yes | 0         | pT3b | Pos | Pos |                    |
| 559        | 1     | F   | 38               | OD          | D    | 68               | 4             | 0             | 3                | 0              | 1               | No                  | No  |           |      | Pos | Pos |                    |
| 560        | 1     | F   | 28               | OD          | D    | 77               | 4             | 0             | 4                | 0              | 0               | Yes                 | Yes | 10        | pT3d | Neg | Pos | 77                 |
| 561        | 1     | M   | 5                | OD          | D    | 77               | 6             | 0             | 6                | 0              | 1               | Yes                 | Yes | 27        | pT1  | Pos | Pos |                    |
| 562        | 1     | F   | 4                | OS          | D    | 76               | 1             | 2             | 6                | 0              | 0               | No                  | No  |           |      | Pos | Pos |                    |
| 563        | 3     | F   | 27               | OS          | D    | 88               | 0             | 0             |                  |                |                 |                     | Yes | 0         | pT1  | Pos | Pos |                    |
| 564        | 1     | F   | 24               | OS          | D    | 79               | 3             | 0             | 3                | 1              | 0               | No                  | No  |           |      | Pos | Pos |                    |
| 565        | 1     | M   | 50               | OS          | D    | 76               | 1             | 3             | 5                | 0              | 1               | No                  | No  |           |      | Pos | Pos |                    |
| 566        | 3     | F   | 35               | OS          | D    | 88               | 0             | 0             |                  |                |                 |                     | Yes | 1         | pT1  | Pos | Pos |                    |
| 567        | 1     | M   | 44               | OD          | D    | 80               | 6             | 0             | 6                | 1              | 2               | Yes                 | Yes | 22        | pT2a | Pos | Pos |                    |
| 568        | 1     | M   | 27               | OS          | D    | 71               | 3             | 0             | 2                | 1              | 1               | No                  | No  |           |      | Pos | Pos |                    |
| 569        | 1     | F   | 7                | OD          | D    | 78               | 3             | 0             | 3                | 1              | 0               | No                  | No  |           |      | Pos | Pos |                    |
| 570        | 3     | F   | 20               | OS          | D    | 76               | 0             | 0             |                  |                |                 |                     | Yes | 0         | N/A  | Pos | Pos |                    |
| 571        | 1     | M   | 29               | OD          | D    | 76               | 3             | 0             | 7                | 0              | 0               | Yes                 | No  |           |      | Pos | Pos |                    |
| 572        | 1     | F   | 13               | OS          | D    | 75               | 5             | 0             | 5                | 0              | 0               | No                  | No  |           |      | Pos | Pos |                    |
| 573        | 1     | M   | 19               | OD          | D    | 71               | 4             | 0             | 4                | 0              | 0               | No                  | No  |           |      | Pos | Pos |                    |
| 574        | 3     | M   | 3                | OD          | D    | 81               | 0             | 0             |                  |                |                 |                     | Yes | 0         | pT1  | Pos | Pos |                    |
| 575        | 1     | M   | 34               | OS          | D    | 74               | 2             | 0             | 4                | 0              | 1               | Yes                 | Yes | 39        | pT3c | Pos | Pos |                    |
| 576        | 3     | F   | 43               | OD          | D    | 65               | 0             | 0             |                  |                |                 |                     | Yes | 0         | pT1  | Pos | Pos |                    |



# Safety of Tylectomy in Salvage of Eyes Affected by Retinoblastoma

Raw data, Table S2

| Patient ID | Group | Sex | Age at Dx months | Studied Eye | IIRC | Follow-up Months | Pre-Tyl IVC # | Pre-Tyl IAC # | Dx to Tyl months | Post-Tyl IVC # | Post-Tyl Ivtc # | Post-Tyl Recurrence | Enu | Dx to Enu | pTNM | OS  | DDS | Dx to Death months |
|------------|-------|-----|------------------|-------------|------|------------------|---------------|---------------|------------------|----------------|-----------------|---------------------|-----|-----------|------|-----|-----|--------------------|
| 577        | 2     | M   | 12               | OS          | D    | 87               | 2             | 0             |                  |                |                 |                     | Yes | 3         | pT1  | Pos | Pos |                    |
| 578        | 1     | M   | 21               | OD          | D    | 74               | 3             | 0             | 2                | 0              | 0               | Yes                 | Yes | 9         | pT2a | Pos | Pos |                    |
| 579        | 2     | F   | 31               | OS          | D    | 15               | 3             | 0             |                  |                |                 |                     | No  |           |      | Pos | Pos |                    |
| 580        | 1     | F   | 8                | OS          | D    | 75               | 3             | 0             | 2                | 0              | 1               | No                  | No  |           |      | Pos | Pos |                    |
| 581        | 2     | F   | 12               | OD          | D    | 49               | 0             | 5             |                  |                |                 |                     | No  |           |      | Pos | Pos |                    |
| 582        | 1     | F   | 30               | OD          | D    | 73               | 3             | 0             | 2                | 0              | 0               | No                  | Yes | 3         | pT1  | Pos | Pos |                    |
| 583        | 1     | M   | 13               | OD          | D    | 74               | 2             | 2             | 5                | 0              | 1               | No                  | No  |           |      | Pos | Pos |                    |
| 584        | 2     | M   | 15               | OD          | D    | 2                | 2             | 0             |                  |                |                 |                     | No  |           |      | Pos | Pos |                    |
| 585        | 1     | F   | 4                | OD          | D    | 78               | 6             | 0             | 5                | 1              | 1               | No                  | No  |           |      | Pos | Pos |                    |
| 586        | 2     | M   | 13               | OD          | D    | 17               | 3             | 0             |                  |                |                 |                     | Yes | 3         | pT1  | Pos | Pos |                    |
| 587        | 1     | M   | 28               | OS          | D    | 73               | 3             | 0             | 4                | 0              | 1               | No                  | No  |           |      | Pos | Pos |                    |
| 588        | 2     | F   | 24               | OD          | D    | 74               | 6             | 0             |                  |                |                 |                     | No  |           |      | Pos | Pos |                    |
| 589        | 3     | M   | 53               | OS          | D    | 77               | 0             | 0             |                  |                |                 |                     | Yes | 0         | pT1  | Pos | Pos |                    |
| 590        | 2     | F   | 27               | OD          | D    | 62               | 2             | 0             |                  |                |                 |                     | Yes | 2         | pT1  | Pos | Pos |                    |
| 591        | 1     | M   | 9                | OD          | D    | 75               | 2             | 0             | 3                | 0              | 0               | No                  | No  |           |      | Pos | Pos |                    |
| 592        | 3     | M   | 21               | OD          | D    | 85               | 0             | 0             |                  |                |                 |                     | Yes | 0         | pT1  | Pos | Pos |                    |
| 593        | 1     | F   | 8                | OD          | D    | 77               | 3             | 0             | 3                | 0              | 1               | No                  | No  |           |      | Pos | Pos |                    |
| 594        | 2     | M   | 36               | OS          | D    | 8                | 1             | 0             |                  |                |                 |                     | No  |           |      | Pos | Pos |                    |
| 595        | 3     | F   | 39               | OD          | D    | 84               | 0             | 0             |                  |                |                 |                     | Yes | 1         | pT1  | Pos | Pos |                    |
| 596        | 2     | M   | 21               | OD          | D    | 70               | 6             | 0             |                  |                |                 |                     | Yes | 13        | N/A  | Pos | Pos |                    |
| 597        | 1     | F   | 56               | OS          | D    | 74               | 2             | 0             | 2                | 0              | 1               | No                  | No  |           |      | Pos | Pos |                    |
| 598        | 3     | M   | 33               | OD          | D    | 71               | 0             | 0             |                  |                |                 |                     | Yes | 0         | pT2a | Pos | Pos |                    |
| 599        | 1     | M   | 34               | OD          | D    | 79               | 2             | 0             | 2                | 2              | 1               | No                  | No  |           |      | Pos | Pos |                    |
| 600        | 1     | F   | 37               | OD          | D    | 71               | 3             | 0             | 3                | 0              | 0               | Yes                 | Yes | 36        | pT2a | Pos | Pos |                    |
| 601        | 3     | F   | 12               | OD          | D    | 70               | 0             | 0             |                  |                |                 |                     | Yes | 0         | N/A  | Pos | Pos |                    |
| 602        | 1     | M   | 22               | OS          | D    | 78               | 2             | 0             | 2                | 2              | 1               | No                  | No  |           |      | Pos | Pos |                    |
| 603        | 1     | M   | 36               | OS          | D    | 75               | 2             | 0             | 3                | 0              | 1               | Yes                 | Yes | 23        | pT2a | Pos | Pos |                    |
| 604        | 3     | M   | 3                | OS          | D    | 75               | 0             | 0             |                  |                |                 |                     | Yes | 3         | pT1  | Pos | Pos |                    |
| 605        | 1     | M   | 31               | OD          | D    | 75               | 4             | 0             | 3                | 1              | 1               | Yes                 | Yes | 6         | pT4  | Pos | Pos |                    |
| 606        | 3     | F   | 13               | OD          | D    | 50               | 0             | 0             |                  |                |                 |                     | Yes | 0         | pT3b | Pos | Pos |                    |
| 607        | 1     | F   | 28               | OS          | D    | 67               | 3             | 0             | 3                | 0              | 0               | Yes                 | Yes | 10        | pT3a | Pos | Pos |                    |
| 608        | 2     | F   | 3                | OD          | D    | 48               | 6             | 0             |                  |                |                 |                     | No  |           |      | Pos | Pos |                    |
| 609        | 2     | F   | 119              | OS          | D    | 3                | 1             | 1             |                  |                |                 |                     | No  |           |      | Pos | Pos |                    |
| 610        | 3     | F   | 17               | OD          | D    | 69               | 0             | 0             |                  |                |                 |                     | Yes | 1         | pT1  | Pos | Pos |                    |
| 611        | 3     | M   | 23               | OD          | D    | 71               | 0             | 0             |                  |                |                 |                     | Yes | 3         | pT1  | Pos | Pos |                    |
| 612        | 1     | F   | 37               | OD          | D    | 73               | 4             | 1             | 5                | 0              | 0               | No                  | No  |           |      | Pos | Pos |                    |
| 613        | 1     | M   | 25               | OD          | D    | 69               | 0             | 2             | 2                | 1              | 3               | No                  | No  |           |      | Pos | Pos |                    |
| 614        | 3     | M   | 15               | OS          | D    | 29               | 0             | 0             |                  |                |                 |                     | Yes | 19        | pT4  | Neg | Neg | 29                 |
| 615        | 2     | M   | 20               | OD          | D    | 82               | 3             | 0             |                  |                |                 |                     | Yes | 2         | pT1  | Pos | Pos |                    |
| 616        | 2     | M   | 30               | OS          | D    | 82               | 2             | 0             |                  |                |                 |                     | Yes | 2         | pT1  | Pos | Pos |                    |
| 617        | 2     | M   | 23               | OD          | D    | 80               | 2             | 0             |                  |                |                 |                     | Yes | 2         | pT1  | Pos | Pos |                    |
| 618        | 1     | M   | 13               | OD          | D    | 66               | 2             | 0             | 2                | 1              | 1               | No                  | No  |           |      | Pos | Pos |                    |
| 619        | 3     | F   | 25               | OD          | D    | 82               | 0             | 0             |                  |                |                 |                     | Yes | 0         | N/A  | Pos | Pos |                    |
| 620        | 2     | F   | 4                | OS          | D    | 81               | 7             | 0             |                  |                |                 |                     | Yes | 6         | pT1  | Pos | Pos |                    |
| 621        | 1     | M   | 34               | OD          | D    | 66               | 2             | 0             | 2                | 1              | 2               | No                  | No  |           |      | Pos | Pos |                    |
| 622        | 1     | F   | 31               | OD          | D    | 76               | 4             | 0             | 4                | 0              | 0               | No                  | No  |           |      | Pos | Pos |                    |
| 623        | 2     | M   | 20               | OS          | D    | 76               | 2             | 0             |                  |                |                 |                     | Yes | 2         | pT1  | Pos | Pos |                    |
| 624        | 2     | F   | 44               | OS          | D    | 7                | 3             | 0             |                  |                |                 |                     | Yes | 3         | pT1  | Pos | Pos |                    |
| 625        | 1     | M   | 22               | OD          | D    | 67               | 2             | 0             | 2                | 2              | 0               | No                  | No  |           |      | Pos | Pos |                    |
| 626        | 3     | F   | 30               | OS          | D    | 81               | 0             | 0             |                  |                |                 |                     | Yes | 0         | N/A  | Pos | Pos |                    |
| 627        | 2     | M   | 17               | OD          | D    | 38               | 0             | 3             |                  |                |                 |                     | No  |           |      | Pos | Pos |                    |
| 628        | 1     | M   | 48               | OS          | D    | 70               | 1             | 0             | 1                | 1              | 1               | No                  | No  |           |      | Pos | Pos |                    |
| 629        | 1     | F   | 15               | OS          | D    | 70               | 3             | 0             | 3                | 0              | 1               | No                  | No  |           |      | Pos | Pos |                    |
| 630        | 1     | F   | 14               | OS          | D    | 67               | 0             | 2             | 1                | 0              | 2               | No                  | No  |           |      | Pos | Pos |                    |
| 631        | 1     | F   | 23               | OS          | D    | 68               | 3             | 0             | 3                | 1              | 1               | No                  | No  |           |      | Pos | Pos |                    |
| 632        | 1     | F   | 30               | OS          | D    | 69               | 2             | 0             | 6                | 0              | 0               | No                  | No  |           |      | Pos | Pos |                    |
| 633        | 1     | M   | 29               | OS          | D    | 67               | 2             | 0             | 3                | 0              | 1               | Yes                 | Yes | 11        | pT3c | Pos | Pos |                    |
| 634        | 1     | M   | 22               | OD          | D    | 69               | 0             | 0             | 0                | 2              | 3               | No                  | No  |           |      | Pos | Pos |                    |
| 635        | 1     | F   | 10               | OD          | D    | 68               | 1             | 0             | 1                | 0              | 0               | No                  | No  |           |      | Pos | Pos |                    |
| 636        | 3     | M   | 37               | OS          | D    | 69               | 0             | 0             |                  |                |                 |                     | Yes | 0         | N/A  | Pos | Pos |                    |
| 637        | 2     | F   | 13               | OS          | D    | 79               | 3             | 3             |                  |                |                 |                     | No  |           |      | Pos | Pos |                    |
| 638        | 3     | F   | 35               | OD          | D    | 77               | 0             | 0             |                  |                |                 |                     | Yes | 0         | pT1  | Pos | Pos |                    |
| 639        | 2     | F   | 73               | OD          | D    | 6                | 5             | 0             |                  |                |                 |                     | No  |           |      | Pos | Pos |                    |
| 640        | 3     | M   | 49               | OD          | D    | 74               | 0             | 0             |                  |                |                 |                     | Yes | 0         | pT1  | Pos | Pos |                    |
| 641        | 3     | F   | 8                | OS          | D    | 73               | 0             | 0             |                  |                |                 |                     | Yes | 0         | pT3b | Pos | Pos |                    |
| 642        | 1     | M   | 16               | OS          | D    | 68               | 2             | 0             | 2                | 0              | 0               | Yes                 | No  |           |      | Pos | Pos |                    |
| 643        | 1     | M   | 27               | OD          | D    | 70               | 4             | 0             | 3                | 0              | 0               | No                  | No  |           |      | Pos | Pos |                    |
| 644        | 2     | F   | 28               | OD          | D    | 5                | 3             | 2             |                  |                |                 |                     | No  |           |      | Pos | Pos |                    |
| 645        | 2     | M   | 23               | OS          | D    | 71               | 2             | 0             |                  |                |                 |                     | Yes | 3         | pT1  | Pos | Pos |                    |
| 646        | 2     | F   | 30               | OS          | D    | 4                | 0             | 4             |                  |                |                 |                     | Yes | 7         | N/A  | Pos | Pos |                    |
| 647        | 1     | M   | 30               | OS          | D    | 71               | 2             | 0             | 2                | 0              | 2               | Yes                 | Yes | 7         | pT3d | Pos | Pos |                    |
| 648        | 3     | M   | 24               | OS          | D    | 71               | 0             | 0             |                  |                |                 |                     | Yes | 0         | pT1  | Pos | Pos |                    |

# Safety of Tylectomy in Salvage of Eyes Affected by Retinoblastoma

Raw data, Table S2

| Patient ID | Group | Sex | Age at Dx months | Studied Eye | IIRC | Follow-up Months | Pre-Tyl IVC # | Pre-Tyl IAC # | Dx to Tyl months | Post-Tyl IVC # | Post-Tyl Ivtc # | Post-Tyl Recurrence | Enu | Dx to Enu | pTNM | OS  | DDS | Dx to Death months |
|------------|-------|-----|------------------|-------------|------|------------------|---------------|---------------|------------------|----------------|-----------------|---------------------|-----|-----------|------|-----|-----|--------------------|
| 649        | 3     | M   | 51               | OS          | D    | 64               | 0             | 0             |                  |                |                 |                     | Yes | 0         | N/A  | Pos | Pos |                    |
| 650        | 1     | F   | 2                | OS          | D    | 70               | 2             | 0             | 2                | 0              | 2               | No                  | No  |           |      | Pos | Pos |                    |
| 651        | 2     | F   | 47               | OD          | D    | 67               | 0             | 4             |                  |                |                 |                     | No  |           |      | Pos | Pos |                    |
| 652        | 3     | M   | 21               | OS          | D    | 66               | 0             | 0             |                  |                |                 |                     | Yes | 0         | pT3b | Pos | Pos |                    |
| 653        | 3     | M   | 14               | OD          | D    | 54               | 0             | 0             |                  |                |                 |                     | Yes | 0         | N/A  | Pos | Pos |                    |
| 654        | 3     | F   | 10               | OD          | D    | 65               | 0             | 0             |                  |                |                 |                     | Yes | 0         | pT2a | Pos | Pos |                    |
| 655        | 1     | M   | 39               | OD          | D    | 64               | 0             | 3             | 4                | 0              | 0               | No                  | No  |           |      | Pos | Pos |                    |
| 656        | 1     | F   | 5                | OS          | D    | 63               | 2             | 0             | 2                | 0              | 1               | No                  | No  |           |      | Pos | Pos |                    |
| 657        | 2     | M   | 13               | OD          | D    | 64               | 0             | 4             |                  |                |                 |                     | Yes | 5         | N/A  | Pos | Pos |                    |
| 658        | 1     | M   | 29               | OD          | D    | 64               | 4             | 0             | 5                | 0              | 2               | Yes                 | Yes | 13        | pT3c | Pos | Pos |                    |
| 659        | 3     | M   | 3                | OD          | D    | 72               | 0             | 0             |                  |                |                 |                     | Yes | 0         | pT1  | Pos | Pos |                    |
| 660        | 1     | F   | 9                | OS          | D    | 63               | 2             | 0             | 1                | 0              | 2               | No                  | No  |           |      | Pos | Pos |                    |
| 661        | 2     | M   | 20               | OS          | D    | 77               | 0             | 4             |                  |                |                 |                     | Yes | 6         | pT1  | Pos | Pos |                    |
| 662        | 1     | M   | 30               | OS          | D    | 66               | 5             | 4             | 19               | 0              | 0               | No                  | No  |           |      | Pos | Pos |                    |
| 663        | 2     | M   | 19               | OD          | D    | 4                | 2             | 1             |                  |                |                 |                     | No  |           |      | Pos | Pos |                    |
| 664        | 2     | F   | 21               | OS          | D    | 71               | 0             | 3             |                  |                |                 |                     | No  |           |      | Pos | Pos |                    |
| 665        | 3     | M   | 11               | OS          | D    | 63               | 0             | 0             |                  |                |                 |                     | Yes | 0         | pT1  | Pos | Pos |                    |
| 666        | 2     | M   | 36               | OD          | D    | 67               | 6             | 0             |                  |                |                 |                     | Yes | 7         | pT1  | Pos | Pos |                    |
| 667        | 1     | M   | 36               | OS          | D    | 75               | 1             | 1             | 2                | 1              | 0               | No                  | No  |           |      | Pos | Pos |                    |
| 668        | 2     | M   | 23               | OD          | D    | 2                | 2             | 0             |                  |                |                 |                     | No  |           |      | Pos | Pos |                    |
| 669        | 2     | F   | 2                | OD          | D    | 2                | 2             | 0             |                  |                |                 |                     | No  |           |      | Pos | Pos |                    |
| 670        | 1     | M   | 21               | OD          | D    | 65               | 0             | 0             | 1                | 0              | 0               | No                  | No  |           |      | Pos | Pos |                    |
| 671        | 1     | F   | 5                | OD          | D    | 65               | 3             | 0             | 3                | 0              | 0               | Yes                 | No  |           |      | Pos | Pos |                    |
| 672        | 3     | M   | 10               | OD          | D    | 14               | 0             | 0             |                  |                |                 |                     | Yes | 0         | pT3b | Neg | Neg | 14                 |
| 673        | 2     | F   | 21               | OD          | D    | 66               | 2             | 0             |                  |                |                 |                     | Yes | 3         | pT1  | Pos | Pos |                    |
| 674        | 3     | M   | 22               | OS          | D    | 38               | 0             | 0             |                  |                |                 |                     | Yes | 0         | N/A  | Pos | Pos |                    |
| 675        | 3     | F   | 57               | OD          | D    | 61               | 0             | 0             |                  |                |                 |                     | Yes | 0         | pT1  | Pos | Pos |                    |
| 676        | 2     | M   | 33               | OS          | D    | 70               | 2             | 2             |                  |                |                 |                     | No  |           |      | Pos | Pos |                    |
| 677        | 1     | M   | 43               | OS          | D    | 68               | 3             | 0             | 3                | 0              | 1               | No                  | No  |           |      | Pos | Pos |                    |
| 678        | 2     | M   | 25               | OS          | D    | 68               | 2             | 1             |                  |                |                 |                     | Yes | 3         | pT1  | Pos | Pos |                    |
| 679        | 2     | F   | 21               | OS          | D    | 13               | 0             | 4             |                  |                |                 |                     | No  |           |      | Pos | Pos |                    |
| 680        | 1     | F   | 42               | OD          | D    | 62               | 3             | 0             | 3                | 1              | 1               | Yes                 | Yes | 12        | pT4  | Pos | Pos |                    |
| 681        | 1     | M   | 5                | OD          | D    | 63               | 2             | 0             | 2                | 0              | 0               | Yes                 | Yes | 11        | pT1  | Pos | Pos |                    |
| 682        | 1     | M   | 31               | OD          | D    | 64               | 4             | 0             | 6                | 0              | 0               | No                  | No  |           |      | Pos | Pos |                    |
| 683        | 2     | M   | 3                | OS          | D    | 65               | 3             | 0             |                  |                |                 |                     | Yes | 3         | pT1  | Pos | Pos |                    |
| 684        | 2     | F   | 28               | OD          | D    | 27               | 2             | 0             |                  |                |                 |                     | Yes | 3         | pT3b | Neg | Neg | 27                 |
| 685        | 1     | F   | 45               | OS          | D    | 64               | 5             | 0             | 6                | 0              | 0               | No                  | No  |           |      | Pos | Pos |                    |
| 686        | 2     | M   | 62               | OS          | D    | 63               | 2             | 0             |                  |                |                 |                     | Yes | 2         | pT1  | Pos | Pos |                    |
| 687        | 1     | F   | 4                | OD          | D    | 61               | 0             | 3             | 6                | 0              | 0               | No                  | No  |           |      | Pos | Pos |                    |
| 688        | 2     | M   | 9                | OD          | D    | 63               | 3             | 0             |                  |                |                 |                     | Yes | 4         | N/A  | Pos | Pos |                    |
| 689        | 3     | M   | 11               | OD          | D    | 74               | 0             | 0             |                  |                |                 |                     | Yes | 0         | N/A  | Pos | Pos |                    |
| 690        | 2     | F   | 25               | OD          | D    | 3                | 0             | 3             |                  |                |                 |                     | No  |           |      | Pos | Pos |                    |
| 691        | 2     | M   | 20               | OD          | D    | 46               | 0             | 4             |                  |                |                 |                     | No  |           |      | Pos | Pos |                    |
| 692        | 3     | F   | 19               | OD          | D    | 74               | 0             | 0             |                  |                |                 |                     | Yes | 0         | pT3b | Pos | Pos |                    |
| 693        | 1     | M   | 24               | OS          | D    | 66               | 0             | 2             | 3                | 0              | 1               | No                  | No  |           |      | Pos | Pos |                    |
| 694        | 2     | F   | 10               | OD          | D    | 74               | 2             | 0             |                  |                |                 |                     | Yes | 3         | pT1  | Pos | Pos |                    |
| 695        | 2     | F   | 32               | OS          | D    | 58               | 2             | 0             |                  |                |                 |                     | Yes | 2         | pT3b | Pos | Pos |                    |
| 696        | 2     | F   | 23               | OD          | D    | 1                | 2             | 0             |                  |                |                 |                     | No  |           |      | Pos | Pos |                    |
| 697        | 1     | F   | 36               | OD          | D    | 17               | 3             | 0             | 2                | 0              | 0               | Yes                 | Yes | 8         | pT3a | Neg | Neg | 17                 |
| 698        | 2     | M   | 12               | OD          | D    | 68               | 6             | 0             |                  |                |                 |                     | No  |           |      | Pos | Pos |                    |
| 699        | 2     | M   | 19               | OD          | D    | 66               | 2             | 0             |                  |                |                 |                     | Yes | 2         | pT3b | Pos | Pos |                    |
| 700        | 1     | M   | 26               | OD          | D    | 68               | 2             | 0             | 2                | 0              | 0               | Yes                 | Yes | 13        | pT3d | Pos | Pos |                    |
| 701        | 3     | M   | 36               | OS          | D    | 62               | 0             | 0             |                  |                |                 |                     | Yes | 0         | pT3d | Pos | Pos |                    |
| 702        | 1     | M   | 15               | OD          | D    | 59               | 2             | 0             | 1                | 1              | 1               | No                  | No  |           |      | Pos | Pos |                    |
| 703        | 1     | F   | 3                | OD          | D    | 57               | 1             | 0             | 1                | 1              | 1               | No                  | No  |           |      | Pos | Pos |                    |
| 704        | 3     | M   | 23               | OD          | D    | 73               | 0             | 0             |                  |                |                 |                     | Yes | 0         | pT1  | Pos | Pos |                    |
| 705        | 1     | M   | 27               | OS          | D    | 64               | 2             | 0             | 2                | 1              | 0               | Yes                 | Yes | 14        | pT1  | Pos | Pos |                    |
| 706        | 2     | F   | 30               | OD          | D    | 4                | 4             | 0             |                  |                |                 |                     | No  |           |      | Pos | Pos |                    |
| 707        | 1     | M   | 33               | OD          | D    | 79               | 0             | 0             | 0                | 3              | 0               | No                  | No  |           |      | Neg | Pos | 80                 |
| 708        | 3     | M   | 46               | OD          | D    | 59               | 0             | 0             |                  |                |                 |                     | Yes | 0         | pT1  | Pos | Pos |                    |
| 709        | 2     | F   | 7                | OS          | D    | 1                | 2             | 0             |                  |                |                 |                     | No  |           |      | Pos | Pos |                    |
| 710        | 1     | M   | 40               | OD          | D    | 56               | 1             | 0             | 1                | 1              | 1               | No                  | No  |           |      | Pos | Pos |                    |
| 711        | 3     | M   | 21               | OS          | D    | 57               | 0             | 0             |                  |                |                 |                     | Yes | 0         | pT1  | Pos | Pos |                    |
| 712        | 1     | M   | 23               | OD          | D    | 61               | 1             | 0             | 1                | 1              | 0               | No                  | No  |           |      | Pos | Pos |                    |
| 713        | 3     | M   | 17               | OD          | D    | 56               | 0             | 0             |                  |                |                 |                     | Yes | 1         | pT1  | Pos | Pos |                    |
| 714        | 2     | F   | 14               | OD          | D    | 55               | 1             | 0             |                  |                |                 |                     | Yes | 1         | pT1  | Pos | Pos |                    |
| 715        | 1     | F   | 13               | OS          | D    | 61               | 2             | 0             | 2                | 1              | 0               | No                  | No  |           |      | Pos | Pos |                    |
| 716        | 2     | F   | 13               | OS          | D    | 61               | 3             | 0             |                  |                |                 |                     | Yes | 2         | pT1  | Pos | Pos |                    |
| 717        | 2     | M   | 6                | OS          | D    | 58               | 3             | 3             |                  |                |                 |                     | No  |           |      | Pos | Pos |                    |
| 718        | 3     | F   | 21               | OS          | D    | 65               | 0             | 0             |                  |                |                 |                     | Yes | 0         | pT1  | Pos | Pos |                    |
| 719        | 1     | M   | 30               | OD          | D    | 61               | 3             | 0             | 3                | 1              | 0               | No                  | No  |           |      | Pos | Pos |                    |
| 720        | 3     | F   | 9                | OD          | D    | 34               | 0             | 0             |                  |                |                 |                     | Yes | 0         | N/A  | Pos | Pos |                    |

# Safety of Tylectomy in Salvage of Eyes Affected by Retinoblastoma

Raw data, Table S2

| Patient ID | Group | Sex | Age at Dx months | Studied Eye | IIRC | Follow-up Months | Pre-Tyl IVC # | Pre-Tyl IAC # | Dx to Tyl months | Post-Tyl IVC # | Post-Tyl Ivtc # | Post-Tyl Recurrence | Enu | Dx to Enu | pTNM | OS  | DDS | Dx to Death months |
|------------|-------|-----|------------------|-------------|------|------------------|---------------|---------------|------------------|----------------|-----------------|---------------------|-----|-----------|------|-----|-----|--------------------|
| 721        | 1     | M   | 52               | OD          | D    | 61               | 3             | 0             | 4                | 0              | 0               | Yes                 | Yes | 15        | pT1  | Pos | Pos | 38                 |
| 722        | 2     | M   | 20               | OS          | D    | 63               | 3             | 0             |                  |                |                 |                     | Yes | 2         | pT1  | Pos | Pos |                    |
| 723        | 1     | F   | 11               | OD          | D    | 60               | 0             | 1             | 1                | 1              | 0               | No                  | No  |           |      | Pos | Pos |                    |
| 724        | 2     | F   | 9                | OS          | D    | 38               | 4             | 0             |                  |                |                 |                     | Yes | 9         | pT1  | Neg | Neg |                    |
| 725        | 3     | M   | 12               | OS          | D    | 71               | 0             | 0             |                  |                |                 |                     | Yes | 0         | pT1  | Pos | Pos |                    |
| 726        | 1     | F   | 36               | OD          | D    | 69               | 2             | 0             | 2                | 0              | 0               | Yes                 | Yes | 13        | pT1  | Pos | Pos |                    |
| 727        | 2     | M   | 3                | OD          | D    | 60               | 2             | 2             |                  |                |                 |                     | Yes | 8         | pT1  | Pos | Pos |                    |
| 728        | 2     | F   | 36               | OS          | D    | 57               | 1             | 2             |                  |                |                 |                     | No  |           |      | Pos | Pos |                    |
| 729        | 3     | F   | 41               | OS          | D    | 60               | 0             | 0             |                  |                |                 |                     | Yes | 0         | pT1  | Pos | Pos |                    |
| 730        | 1     | M   | 4                | OD          | D    | 59               | 2             | 2             | 5                | 0              | 0               | No                  | No  |           |      | Pos | Pos |                    |
| 731        | 3     | F   | 41               | OS          | D    | 70               | 0             | 0             |                  |                |                 |                     | Yes | 0         | pT3a | Pos | Pos | 21                 |
| 732        | 2     | F   | 14               | OD          | D    | 63               | 4             | 0             |                  |                |                 |                     | Yes | 9         | pT1  | Pos | Pos |                    |
| 733        | 1     | M   | 21               | OD          | D    | 60               | 6             | 0             | 6                | 1              | 0               | No                  | No  |           |      | Pos | Pos |                    |
| 734        | 2     | M   | 14               | OD          | D    | 57               | 2             | 3             |                  |                |                 |                     | No  |           |      | Pos | Pos |                    |
| 735        | 2     | M   | 21               | OS          | D    | 36               | 6             | 3             |                  |                |                 |                     | No  |           |      | Pos | Pos |                    |
| 736        | 1     | M   | 32               | OD          | D    | 62               | 2             | 2             | 5                | 0              | 0               | No                  | No  |           |      | Pos | Pos |                    |
| 737        | 2     | M   | 33               | OD          | D    | 58               | 2             | 0             |                  |                |                 |                     | Yes | 3         | pT1  | Pos | Pos |                    |
| 738        | 3     | F   | 9                | OD          | D    | 0                | 0             | 0             |                  |                |                 |                     | Yes | 0         | pT2a | Pos | Pos |                    |
| 739        | 3     | M   | 22               | OS          | D    | 69               | 0             | 0             |                  |                |                 |                     | Yes | 0         | pT1  | Pos | Pos |                    |
| 740        | 1     | F   | 45               | OS          | D    | 57               | 1             | 1             | 2                | 0              | 0               | Yes                 | Yes | 13        | pT4  | Pos | Pos |                    |
| 741        | 3     | F   | 34               | OS          | D    | 70               | 0             | 0             |                  |                |                 |                     | Yes | 0         | pT1  | Pos | Pos | 12                 |
| 742        | 1     | M   | 5                | OS          | D    | 59               | 2             | 0             | 2                | 0              | 0               | No                  | No  |           |      | Pos | Pos |                    |
| 743        | 1     | M   | 65               | OD          | D    | 3                | 2             | 0             | 3                | 0              | 0               | No                  | No  |           |      | Pos | Pos |                    |
| 744        | 3     | M   | 25               | OS          | D    | 40               | 0             | 0             |                  |                |                 |                     | Yes | 0         | pT1  | Pos | Pos |                    |
| 745        | 1     | M   | 10               | OS          | D    | 59               | 3             | 0             | 5                | 1              | 0               | No                  | No  |           |      | Pos | Pos |                    |
| 746        | 3     | M   | 44               | OD          | D    | 61               | 0             | 0             |                  |                |                 |                     | Yes | 0         | pT1  | Pos | Pos |                    |
| 747        | 2     | F   | 31               | OS          | D    | 56               | 5             | 0             |                  |                |                 |                     | Yes | 7         | N/A  | Pos | Pos |                    |
| 748        | 2     | F   | 4                | OD          | D    | 56               | 5             | 0             |                  |                |                 |                     | No  |           |      | Pos | Pos |                    |
| 749        | 2     | F   | 1                | OS          | D    | 3                | 3             | 0             |                  |                |                 |                     | No  |           |      | Pos | Pos |                    |
| 750        | 2     | M   | 80               | OD          | D    | 14               | 3             | 0             |                  |                |                 |                     | No  |           |      | Pos | Pos |                    |
| 751        | 1     | F   | 37               | OD          | D    | 57               | 1             | 4             | 6                | 0              | 0               | No                  | No  |           |      | Pos | Pos | 9                  |
| 752        | 1     | F   | 24               | OD          | D    | 55               | 0             | 3             | 5                | 0              | 0               | No                  | No  |           |      | Pos | Pos |                    |
| 753        | 3     | M   | 29               | OS          | D    | 69               | 0             | 0             |                  |                |                 |                     | Yes | 0         | pT1  | Pos | Pos |                    |
| 754        | 2     | M   | 23               | OS          | D    | 21               | 2             | 0             |                  |                |                 |                     | Yes | 11        | pT4  | Neg | Neg |                    |
| 755        | 1     | F   | 117              | OD          | D    | 67               | 0             | 6             | 45               | 0              | 1               | Yes                 | Yes | 59        | pT2b | Pos | Pos |                    |
| 756        | 1     | M   | 30               | OS          | D    | 61               | 3             | 0             | 3                | 0              | 0               | No                  | No  |           |      | Pos | Pos |                    |
| 757        | 1     | F   | 25               | OS          | D    | 58               | 3             | 0             | 3                | 0              | 0               | No                  | No  |           |      | Pos | Pos |                    |
| 758        | 1     | M   | 17               | OS          | D    | 58               | 0             | 2             | 3                | 0              | 0               | No                  | No  |           |      | Pos | Pos |                    |
| 759        | 2     | M   | 43               | OD          | D    | 68               | 2             | 0             |                  |                |                 |                     | Yes | 27        | pT1  | Pos | Pos |                    |
| 760        | 2     | M   | 4                | OD          | D    | 7                | 0             | 2             |                  |                |                 |                     | No  |           |      | Pos | Pos |                    |
| 761        | 1     | M   | 13               | OS          | D    | 58               | 4             | 3             | 15               | 0              | 0               | No                  | No  |           |      | Pos | Pos | 27                 |
| 762        | 3     | M   | 32               | OS          | D    | 57               | 0             | 0             |                  |                |                 |                     | Yes | 0         | pT1  | Pos | Pos |                    |
| 763        | 2     | M   | 21               | OD          | D    | 68               | 2             | 0             |                  |                |                 |                     | Yes | 2         | pT1  | Pos | Pos |                    |
| 764        | 2     | F   | 5                | OS          | D    | 54               | 3             | 0             |                  |                |                 |                     | Yes | 3         | pT1  | Pos | Pos |                    |
| 765        | 1     | F   | 37               | OS          | D    | 12               | 2             | 0             | 3                | 0              | 0               | Yes                 | Yes | 7         | pT4  | Neg | Neg |                    |
| 766        | 1     | F   | 40               | OD          | D    | 60               | 2             | 0             | 2                | 0              | 0               | Yes                 | Yes | 20        | pT2b | Pos | Pos |                    |
| 767        | 2     | M   | 19               | OS          | D    | 53               | 3             | 0             |                  |                |                 |                     | Yes | 31        | N/A  | Pos | Pos |                    |
| 768        | 2     | M   | 41               | OD          | D    | 34               |               | 4             |                  |                |                 |                     | Yes | 5         | N/A  | Pos | Pos |                    |
| 769        | 1     | M   | 10               | OD          | D    | 60               | 0             | 4             | 5                | 0              | 0               | Yes                 | Yes | 8         | pT2b | Pos | Pos |                    |
| 770        | 1     | F   | 8                | OD          | D    | 52               | 2             | 0             | 2                | 0              | 0               | No                  | No  |           |      | Pos | Pos |                    |
| 771        | 2     | F   | 46               | OS          | D    | 54               | 2             | 3             |                  |                |                 |                     | No  |           |      | Pos | Pos | 9                  |
| 772        | 3     | F   | 16               | OD          | D    | 54               | 0             | 0             |                  |                |                 |                     | Yes | 0         | pT1  | Pos | Pos |                    |
| 773        | 2     | M   | 19               | OS          | D    | 2                | 0             | 2             |                  |                |                 |                     | No  |           |      | Pos | Pos |                    |
| 774        | 2     | M   | 39               | OS          | D    | 2                | 0             | 2             |                  |                |                 |                     | No  |           |      | Pos | Pos |                    |
| 775        | 3     | M   | 22               | OD          | D    | 56               | 0             | 0             |                  |                |                 |                     | Yes | 0         | pT1  | Pos | Pos |                    |
| 776        | 1     | M   | 12               | OD          | D    | 58               | 3             | 0             | 3                | 1              | 0               | No                  | No  |           |      | Pos | Pos |                    |
| 777        | 1     | M   | 3                | OS          | D    | 59               | 3             | 0             | 3                | 1              | 0               | No                  | No  |           |      | Pos | Pos |                    |
| 778        | 2     | M   | 26               | OS          | D    | 53               | 2             | 4             |                  |                |                 |                     | No  |           |      | Pos | Pos |                    |
| 779        | 2     | M   | 29               | OS          | D    | 3                | 4             | 0             |                  |                |                 |                     | No  |           |      | Pos | Pos |                    |
| 780        | 3     | M   | 15               | OS          | D    | 56               | 0             | 0             |                  |                |                 |                     | Yes | 0         | pT1  | Pos | Pos |                    |
| 781        | 3     | M   | 50               | OS          | D    | 66               | 0             | 0             |                  |                |                 |                     | Yes | 0         | pT1  | Pos | Pos | 27                 |
| 782        | 3     | M   | 6                | OD          | D    | 58               | 0             | 0             |                  |                |                 |                     | Yes | 0         | pT1  | Pos | Pos |                    |
| 783        | 2     | F   | 19               | OD          | C    | 87               | 2             | 0             |                  |                |                 |                     | No  |           |      | Pos | Pos |                    |
| 784        | 1     | M   | 17               | OS          | E    | 82               | 4             | 0             | 7                | 0              | 1               | Yes                 | Yes | 14        | pT1  | Pos | Pos |                    |
| 785        | 1     | M   | 15               | OD          | C    | 79               | 3             | 2             | 6                | 0              | 0               | Yes                 | No  |           |      | Pos | Pos |                    |
| 786        | 2     | F   | 3                | OD          | C    | 27               | 10            | 0             |                  |                |                 |                     | No  |           |      | Neg | Pos |                    |
| 787        | 2     | F   | 13               | OD          | C    | 14               | 6             | 0             |                  |                |                 |                     | No  |           |      | Pos | Pos |                    |
| 788        | 1     | M   | 19               | OD          | C    | 75               | 4             | 0             | 4                | 0              | 0               | No                  | No  |           |      | Pos | Pos |                    |
| 789        | 2     | M   | 12               | OD          | C    | 9                | 1             | 0             |                  |                |                 |                     | No  |           |      | Neg | Neg |                    |
| 790        | 1     | F   | 14               | OD          | C    | 71               | 2             | 0             | 17               | 0              | 0               | No                  | No  |           |      | Pos | Pos |                    |
| 791        | 2     | F   | 8                | OD          | C    | 59               | 5             | 0             |                  |                |                 |                     | No  |           |      | Pos | Pos | 9                  |
| 792        | 2     | M   | 19               | OD          | C    | 18               | 2             | 0             |                  |                |                 |                     | No  |           |      | Pos | Pos |                    |

# Safety of Tylectomy in Salvage of Eyes Affected by Retinoblastoma

Raw data, Table S2

| Patient ID | Group | Sex | Age at Dx months | Studied Eye | IIRC | Follow-up Months | Pre-Tyl IVC # | Pre-Tyl IAC # | Dx to Tyl months | Post-Tyl IVC # | Post-Tyl Ivtc # | Post-Tyl Recurrence | Enu | Dx to Enu | pTNM | OS  | DDS | Dx to Death months |
|------------|-------|-----|------------------|-------------|------|------------------|---------------|---------------|------------------|----------------|-----------------|---------------------|-----|-----------|------|-----|-----|--------------------|
| 793        | 2     | F   | 51               | OD          | C    | 55               | 6             | 0             |                  |                |                 |                     | No  |           |      | Pos | Pos |                    |
| 794        | 2     | F   | 10               | OD          | C    | 54               | 2             | 0             |                  |                |                 |                     | No  |           |      | Pos | Pos |                    |
| 795        | 2     | M   | 5                | OD          | C    | 59               | 4             | 2             |                  |                |                 |                     | No  |           |      | Pos | Pos |                    |
| 796        | 1     | M   | 43               | OS          | D    | 78               | 4             | 0             | 4                | 2              | 0               | Yes                 | No  |           |      | Pos | Pos |                    |
| 797        | 1     | F   | 45               | OS          | D    | 79               | 5             | 0             | 5                | 0              | 1               | No                  | No  |           |      | Pos | Pos |                    |
| 798        | 1     | F   | 7                | OD          | C    | 82               | 6             | 1             | 15               | 0              | 0               | No                  | No  |           |      | Pos | Pos |                    |
| 799        | 1     | F   | 12               | OS          | D    | 71               | 3             | 0             | 3                | 1              | 0               | No                  | No  |           |      | Pos | Pos |                    |
| 800        | 2     | F   | 4                | OD          | C    | 5                | 5             | 0             |                  |                |                 |                     | No  |           |      | Pos | Pos |                    |
| 801        | 1     | M   | 38               | OD          | C    | 75               | 3             | 0             | 4                | 0              | 0               | No                  | No  |           |      | Pos | Pos |                    |
| 802        | 1     | M   | 2                | OS          | D    | 68               | 3             | 0             | 4                | 0              | 1               | No                  | No  |           |      | Pos | Pos |                    |
| 803        | 2     | F   | 10               | OD          | C    | 14               | 4             | 3             |                  |                |                 |                     | No  |           |      | Neg | Neg | 15                 |
| 804        | 2     | M   | 11               | OD          | C    | 82               | 4             | 0             |                  |                |                 |                     | No  |           |      | Pos | Pos |                    |
| 805        | 2     | M   | 11               | OD          | C    | 82               | 4             | 0             |                  |                |                 |                     | No  |           |      | Pos | Pos |                    |
| 806        | 1     | F   | 8                | OD          | C    | 72               | 5             | 0             | 8                | 0              | 0               | No                  | No  |           |      | Pos | Pos |                    |
| 807        | 2     | F   | 32               | OD          | C    | 77               | 0             | 2             |                  |                |                 |                     | No  |           |      | Pos | Pos |                    |
| 808        | 1     | M   | 6                | OD          | C    | 73               | 2             | 2             | 20               | 0              | 0               | No                  | No  |           |      | Pos | Pos |                    |
| 809        | 1     | M   | 4                | OD          | C    | 87               | 3             | 0             | 15               | 0              | 0               | No                  | No  |           |      | Pos | Pos |                    |
| 810        | 1     | F   | 1                | OS          | C    | 81               | 5             | 0             | 10               | 0              | 0               | No                  | No  |           |      | Pos | Pos |                    |
| 811        | 2     | M   | 14               | OS          | C    | 75               | 3             | 0             |                  |                |                 |                     | No  |           |      | Pos | Pos |                    |
| 812        | 1     | F   | 49               | OD          | C    | 72               | 5             | 0             | 6                | 0              | 0               | No                  | No  |           |      | Pos | Pos |                    |
| 813        | 1     | M   | 21               | OD          | C    | 68               | 2             | 0             | 2                | 0              | 0               | No                  | No  |           |      | Pos | Pos |                    |
| 814        | 1     | F   | 24               | OD          | C    | 60               | 1             | 0             | 2                | 0              | 0               | No                  | No  |           |      | Pos | Pos |                    |
| 815        | 1     | M   | 9                | OS          | E    | 94               | 6             | 0             | 17               | 0              | 0               | No                  | No  |           |      | Pos | Pos |                    |
| 816        | 2     | F   | 12               | OD          | B    | 87               | 3             | 0             |                  |                |                 |                     | No  |           |      | Pos | Pos |                    |
| 817        | 1     | M   | 1                | OD          | B    | 52               | 5             | 0             | 14               | 0              | 0               | No                  | No  |           |      | Pos | Pos |                    |
| 818        | 1     | F   | 4                | OD          | B    | 79               | 0             | 0             | 6                | 0              | 0               | No                  | No  |           |      | Pos | Pos |                    |
| 819        | 2     | M   | 10               | OD          | B    | 84               | 1             | 0             |                  |                |                 |                     | No  |           |      | Pos | Pos |                    |
| 820        | 2     | F   | 2                | OD          | B    | 22               | 2             | 0             |                  |                |                 |                     | No  |           |      | Pos | Pos |                    |
| 821        | 2     | F   | 4                | OD          | B    | 4                | 0             | 0             |                  |                |                 |                     | No  |           |      | Pos | Pos |                    |
| 822        | 1     | F   | 9                | OS          | E    | 73               | 3             | 0             | 3                | 3              | 1               | No                  | No  |           |      | Pos | Pos |                    |
| 823        | 2     | F   | 2                | OD          | B    | 71               | 4             | 1             |                  |                |                 |                     | No  |           |      | Pos | Pos |                    |
| 824        | 2     | F   | 2                | OD          | B    | 23               | 2             | 0             |                  |                |                 |                     | No  |           |      | Neg | Pos | 23                 |
| 825        | 2     | M   | 3                | OD          | B    | 4                | 4             | 0             |                  |                |                 |                     | No  |           |      | Pos | Pos |                    |
| 826        | 2     | F   | 5                | OD          | B    | 74               | 5             | 0             |                  |                |                 |                     | No  |           |      | Pos | Pos |                    |
| 827        | 2     | M   | 8                | OD          | B    | 68               | 5             | 0             |                  |                |                 |                     | No  |           |      | Pos | Pos |                    |
| 828        | 2     | F   | 4                | OD          | B    | 72               | 1             | 0             |                  |                |                 |                     | No  |           |      | Pos | Pos |                    |
| 829        | 3     | F   | 13               | OS          | E    | 12               | 0             | 0             |                  |                |                 |                     | Yes | 0         | N/A  | Neg | Neg | 12                 |
| 830        | 2     | M   | 3                | OD          | B    | 68               | 6             | 0             |                  |                |                 |                     | No  |           |      | Pos | Pos |                    |
| 831        | 2     | F   | 5                | OD          | B    | 61               | 1             | 0             |                  |                |                 |                     | No  |           |      | Pos | Pos |                    |
| 832        | 2     | M   | 3                | OD          | B    | 59               | 0             | 1             |                  |                |                 |                     | No  |           |      | Pos | Pos |                    |
| 833        | 2     | F   | 4                | OD          | B    | 62               | 3             | 0             |                  |                |                 |                     | No  |           |      | Pos | Pos |                    |
| 834        | 1     | F   | 7                | OS          | E    | 58               | 4             | 0             | 3                | 0              | 0               | No                  | No  |           |      | Pos | Pos |                    |
| 835        | 2     | M   | 14               | OD          | B    | 87               | 4             | 0             |                  |                |                 |                     | No  |           |      | Pos | Pos |                    |
| 836        | 2     | F   | 6                | OD          | B    | 82               | 3             | 0             |                  |                |                 |                     | No  |           |      | Pos | Pos |                    |
| 837        | 1     | F   | 33               | OS          | D    | 78               | 3             | 0             | 2                | 0              | 0               | No                  | No  |           |      | Pos | Pos |                    |
| 838        | 1     | M   | 27               | OS          | D    | 76               | 5             | 0             | 6                | 0              | 0               | No                  | No  |           |      | Pos | Pos |                    |
| 839        | 2     | F   | 6                | OD          | B    | 87               | 3             | 0             |                  |                |                 |                     | No  |           |      | Pos | Pos |                    |
| 840        | 2     | M   | 5                | OD          | B    | 0                | 1             | 0             |                  |                |                 |                     | No  |           |      | Pos | Pos |                    |
| 841        | 1     | F   | 6                | OD          | B    | 71               | 2             | 0             | 10               | 0              | 0               | No                  | No  |           |      | Pos | Pos |                    |
| 842        | 2     | F   | 7                | OD          | B    | 7                | 6             | 0             |                  |                |                 |                     | No  |           |      | Pos | Pos |                    |
| 843        | 1     | F   | 11               | OD          | B    | 68               | 2             | 0             | 11               | 0              | 0               | No                  | No  |           |      | Pos | Pos |                    |
| 844        | 2     | M   | 3                | OD          | B    | 64               | 4             | 4             |                  |                |                 |                     | No  |           |      | Pos | Pos |                    |
| 845        | 1     | F   | 13               | OS          | D    | 64               | 1             | 0             | 1                | 1              | 1               | No                  | No  |           |      | Pos | Pos |                    |
| 846        | 2     | F   | 2                | OD          | B    | 2                | 1             | 0             |                  |                |                 |                     | No  |           |      | Pos | Pos |                    |
| 847        | 2     | F   | 4                | OD          | B    | 68               | 7             | 0             |                  |                |                 |                     | No  |           |      | Pos | Pos |                    |
| 848        | 2     | M   | 25               | OD          | B    | 55               | 6             | 0             |                  |                |                 |                     | No  |           |      | Pos | Pos |                    |
| 849        | 1     | F   | 14               | OS          | D    | 50               | 3             | 0             | 3                | 0              | 0               | No                  | No  |           |      | Pos | Pos |                    |
| 850        | 2     | M   | 5                | OD          | B    | 91               | 6             | 0             |                  |                |                 |                     | No  |           |      | Pos | Pos |                    |
| 851        | 2     | M   | 2                | OD          | B    | 75               | 6             | 0             |                  |                |                 |                     | No  |           |      | Pos | Pos |                    |
| 852        | 2     | M   | 2                | OD          | B    | 76               | 2             | 2             |                  |                |                 |                     | No  |           |      | Pos | Pos |                    |
| 853        | 2     | M   | 0                | OD          | B    | 59               | 0             | 0             |                  |                |                 |                     | No  |           |      | Pos | Pos |                    |
| 854        | 2     | M   | 26               | OD          | B    | 101              | 2             | 0             |                  |                |                 |                     | No  |           |      | Pos | Pos |                    |
| 855        | 2     | M   | 0                | OD          | B    | 20               | 0             | 3             |                  |                |                 |                     | No  |           |      | Neg | Pos | 20                 |
| 856        | 2     | F   | 12               | OD          | B    | 11               | 0             | 0             |                  |                |                 |                     | No  | 0         | N/A  | Pos | Pos |                    |
| 857        | 2     | M   | 23               | OD          | B    | 61               | 4             | 0             |                  |                |                 |                     | No  |           |      | Pos | Pos |                    |
| 858        | 2     | F   | 12               | OS          | B    | 81               | 0             | 0             |                  |                |                 |                     | No  |           |      | Pos | Pos |                    |
| 859        | 2     | F   | 22               | OS          | B    | 85               | 0             | 0             |                  |                |                 |                     | No  |           |      | Pos | Pos |                    |
| 860        | 2     | F   | 3                | OS          | B    | 71               | 1             | 0             |                  |                |                 |                     | No  |           |      | Pos | Pos |                    |
| 861        | 2     | F   | 6                | OS          | B    | 72               | 0             | 0             |                  |                |                 |                     | No  |           |      | Pos | Pos |                    |
| 862        | 2     | F   | 16               | OS          | B    | 73               | 2             | 0             |                  |                |                 |                     | No  |           |      | Pos | Pos |                    |
| 863        | 2     | F   | 0                | OS          | B    | 64               | 2             | 0             |                  |                |                 |                     | No  |           |      | Pos | Pos |                    |
| 864        | 2     | M   | 0                | OS          | B    | 70               | 0             | 0             |                  |                |                 |                     | No  |           |      | Pos | Pos |                    |

# Safety of Tylectomy in Salvage of Eyes Affected by Retinoblastoma

Raw data, Table S2

| Patient ID | Group | Sex | Age at Dx months | Studied Eye | IIRC | Follow-up Months | Pre-Tyl IVC # | Pre-Tyl IAC # | Dx to Tyl months | Post-Tyl IVC # | Post-Tyl Ivtc # | Post-Tyl Recurrence | Enu | Dx to Enu | pTNM | OS  | DDS | Dx to Death months |
|------------|-------|-----|------------------|-------------|------|------------------|---------------|---------------|------------------|----------------|-----------------|---------------------|-----|-----------|------|-----|-----|--------------------|
| 865        | 1     | F   | 50               | OS          | B    | 64               | 1             | 0             | 3                | 0              | 0               | No                  | No  |           |      | Pos | Pos |                    |
| 866        | 2     | F   | 5                | OS          | B    | 9                | 3             | 0             |                  |                |                 |                     | No  |           |      | Pos | Pos |                    |
| 867        | 2     | M   | 2                | OD          | B    | 2                | 0             | 0             |                  |                |                 |                     | No  |           |      | Pos | Pos |                    |
| 868        | 2     | M   | 13               | OD          | A    | 89               | 0             | 0             |                  |                |                 |                     | No  |           |      | Pos | Pos |                    |
| 869        | 2     | M   | 3                | OD          | A    | 78               | 0             | 0             |                  |                |                 |                     | No  | 14        | N/A  | Pos | Pos |                    |
| 870        | 2     | F   | 2                | OS          | E    | 27               | 3             | 0             |                  |                |                 |                     | No  |           |      | Neg | Neg | 27                 |
| 871        | 2     | M   | 4                | OD          | A    | 66               | 0             | 0             |                  |                |                 |                     | No  | 0         | pT3b | Pos | Pos |                    |
| 872        | 2     | F   | 13               | OD          | A    | 64               | 2             | 0             |                  |                |                 |                     | No  |           |      | Pos | Pos |                    |
| 873        | 2     | F   | 6                | OD          | A    | 83               | 0             | 0             |                  |                |                 |                     | No  |           |      | Pos | Pos |                    |
| 874        | 1     | M   | 6                | OS          | D    | 64               | 2             | 0             | 2                | 0              | 0               | No                  | No  |           |      | Pos | Pos |                    |
| 875        | 2     | F   | 62               | OD          | A    | 87               | 0             | 0             |                  |                |                 |                     | No  |           |      | Pos | Pos |                    |
| 876        | 2     | M   | 6                | OD          | A    | 58               | 6             | 0             |                  |                |                 |                     | No  |           |      | Pos | Pos |                    |
| 877        | 2     | M   | 2                | OD          | A    | 73               | 0             | 0             |                  |                |                 |                     | No  |           |      | Pos | Pos |                    |
| 878        | 2     | M   | 25               | OD          | A    | 77               | 0             | 0             |                  |                |                 |                     | No  | 0         | N/A  | Pos | Pos |                    |
| 879        | 2     | M   | 1                | OD          | A    | 87               | 0             | 0             |                  |                |                 |                     | No  |           |      | Pos | Pos |                    |
| 880        | 2     | F   | 27               | OS          | D    | 15               | 8             | 0             |                  |                |                 |                     | No  |           |      | Pos | Pos |                    |
| 881        | 2     | F   | 3                | OS          | D    | 48               | 7             | 1             |                  |                |                 |                     | No  |           |      | Neg | Neg | 48                 |
| 882        | 1     | F   | 4                | OS          | D    | 77               | 12            | 0             | 30               | 0              | 0               | No                  | No  |           |      | Pos | Pos |                    |
| 883        | 2     | F   | 9                | OD          | ?    | 27               | 6             | 3             |                  |                |                 |                     | Yes | 15        | N/A  | Pos | Pos |                    |
| 884        | 2     | M   | 8                | OS          | D    | 70               | 6             | 0             |                  |                |                 |                     | No  |           |      | Pos | Pos |                    |
| 885        | 1     | M   | 35               | OS          | D    | 67               | 5             | 0             | 5                | 0              | 0               | No                  | No  |           |      | Pos | Pos |                    |
| 886        | 2     | M   | 4                | OS          | B    | 93               | 2             | 0             |                  |                |                 |                     | No  |           |      | Pos | Pos |                    |
| 887        | 2     | M   | 2                | OS          | B    | 6                | 2             | 0             |                  |                |                 |                     | No  |           |      | Pos | Pos |                    |
| 888        | 2     | M   | 25               | OS          | ?    | 1                | 0             | 0             |                  |                |                 |                     | No  | 0         | N/A  | Pos | Pos |                    |
| 889        | 1     | M   | 19               | OS          | B    | 62               | 3             | 0             | 2                | 0              | 0               | No                  | No  |           |      | Pos | Pos |                    |
| 890        | 3     | M   | 44               | OS          | ?    | 102              | 0             | 0             |                  |                |                 |                     | Yes | 0         | pT2b | Pos | Pos |                    |
| 891        | 3     | F   | 19               | OD          | ?    | 100              | 0             | 0             |                  |                |                 |                     | Yes | 0         | N/A  | Pos | Pos |                    |
| 892        | 3     | M   | 18               | OD          | ?    | 88               | 0             | 0             |                  |                |                 |                     | Yes | 0         | N/A  | Pos | Pos |                    |
| 893        | 3     | M   | 5                | OD          | ?    | 11               | 0             | 0             |                  |                |                 |                     | Yes | 0         | N/A  | Pos | Pos |                    |
| 894        | 3     | M   | 19               | OS          | ?    | 93               | 0             | 0             |                  |                |                 |                     | Yes | 0         | pT2b | Pos | Pos |                    |
| 895        | 2     | M   | 10               | OS          | ?    | 16               | 4             | 0             |                  |                |                 |                     | Yes | 7         | N/A  | Pos | Pos |                    |
| 896        | 3     | F   | 4                | OD          | ?    | 79               | 0             | 0             |                  |                |                 |                     | Yes | 0         | N/A  | Pos | Pos |                    |
| 897        | 3     | M   | 25               | OS          | ?    | 81               | 0             | 0             |                  |                |                 |                     | Yes | 0         | N/A  | Pos | Pos |                    |
| 898        | 3     | M   | 25               | OS          | ?    | 5                | 0             | 0             |                  |                |                 |                     | Yes | 0         | pT1  | Pos | Pos |                    |
| 899        | 2     | M   | 30               | OD          | ?    | 84               | 4             | 0             |                  |                |                 |                     | Yes | 4         | N/A  | Pos | Pos |                    |
| 900        | 3     | F   | 2                | OS          | ?    | 79               | 0             | 0             |                  |                |                 |                     | Yes | 0         | N/A  | Pos | Pos |                    |
| 901        | 3     | M   | 25               | OD          | ?    | 33               | 0             | 0             |                  |                |                 |                     | Yes | 0         | N/A  | Pos | Pos |                    |
| 902        | 3     | F   | 7                | OD          | ?    | 81               | 0             | 0             |                  |                |                 |                     | Yes | 0         | pT1  | Pos | Pos |                    |
| 903        | 3     | M   | 28               | OS          | ?    | 74               | 0             | 0             |                  |                |                 |                     | Yes | 0         | N/A  | Pos | Pos |                    |
| 904        | 3     | F   | 28               | OD          | ?    | 76               | 0             | 0             |                  |                |                 |                     | Yes | 0         | N/A  | Pos | Pos |                    |
| 905        | 3     | M   | 55               | OD          | ?    | 75               | 0             | 0             |                  |                |                 |                     | Yes | 0         | N/A  | Pos | Pos |                    |
| 906        | 3     | F   | 28               | OS          | ?    | 86               | 0             | 0             |                  |                |                 |                     | Yes | 0         | pT3a | Pos | Pos |                    |
| 907        | 3     | M   | 60               | OD          | ?    | 72               | 0             | 0             |                  |                |                 |                     | Yes | 0         | N/A  | Pos | Pos |                    |
| 908        | 3     | M   | 44               | OS          | ?    | 48               | 0             | 0             |                  |                |                 |                     | Yes | 0         | N/A  | Pos | Pos |                    |
| 909        | 3     | M   | 28               | OS          | ?    | 69               | 0             | 0             |                  |                |                 |                     | Yes | 0         | N/A  | Pos | Pos |                    |
| 910        | 3     | F   | 17               | OS          | ?    | 71               | 0             | 0             |                  |                |                 |                     | Yes | 0         | N/A  | Pos | Pos |                    |
| 911        | 3     | F   | 23               | OS          | ?    | 80               | 0             | 0             |                  |                |                 |                     | Yes | 0         | pT2a | Pos | Pos |                    |
| 912        | 3     | F   | 12               | OS          | ?    | 47               | 0             | 0             |                  |                |                 |                     | Yes | 0         | N/A  | Pos | Pos |                    |
| 913        | 3     | F   | 31               | OD          | ?    | 78               | 0             | 0             |                  |                |                 |                     | Yes | 0         | N/A  | Pos | Pos |                    |
| 914        | 3     | F   | 7                | OS          | ?    | 3                | 0             | 0             |                  |                |                 |                     | Yes | 0         | pT1  | Pos | Pos |                    |
| 915        | 3     | M   | 74               | OS          | ?    | 0                | 0             | 0             |                  |                |                 |                     | Yes | 0         | N/A  | Pos | Pos |                    |
| 916        | 3     | M   | 46               | OD          | ?    | 76               | 0             | 0             |                  |                |                 |                     | Yes | 0         | N/A  | Pos | Pos |                    |
| 917        | 3     | F   | 26               | OS          | ?    | 64               | 0             | 0             |                  |                |                 |                     | Yes | 0         | N/A  | Pos | Pos |                    |
| 918        | 3     | M   | 27               | OS          | ?    | 66               | 0             | 0             |                  |                |                 |                     | Yes | 0         | N/A  | Pos | Pos |                    |
| 919        | 3     | F   | 36               | OS          | ?    | 69               | 0             | 0             |                  |                |                 |                     | Yes | 0         | N/A  | Pos | Pos |                    |
