# Supplementary material for: Tylectomy Safety in Salvage of Eyes with Retinoblastoma
Source: MDPI journal article supplement (doi:10.3390/cancers13225862), 2021-11-22
Supplement: s1 [file s1]

**Table S3. Treatments and outcomes of tumor recurrence in Group I**

|                                     | Number of<br>eyes/patients | Additional<br>Tylectomy | Salvaged | Enucleated | Survived | Death | Disease-<br>specific<br>Death |
|-------------------------------------|----------------------------|-------------------------|----------|------------|----------|-------|-------------------------------|
| <b>Recurrence after tylectomy</b>   | 75                         |                         |          |            |          |       |                               |
| <b>Enucleation</b>                  | 22                         |                         |          |            | 21       | 1     | 1                             |
| <b>Abandoned treatment</b>          | 1                          |                         |          |            | 0        | 1     | 1                             |
| <b>Additional salvage treatment</b> | 52                         |                         |          |            | 43       | 9     | 7                             |
| <b>Laser or cryo</b>                | 23                         | 0                       | 11       | 12         | 20       | 3*    | 3                             |
| <b>Laser or cryo + IAC</b>          | 1                          | 0                       | 0        | 1          | 1        | 0     | 0                             |
| <b>Laser or cryo + IVitC</b>        | 2                          | 0                       | 1        | 1          | 2        | 0     | 0                             |
| <b>IAC</b>                          | 1                          | 0                       | 0        | 1          | 1        | 0     | 0                             |
| <b>IVC</b>                          | 4                          | 0                       | 1        | 3          | 3        | 1     | 1                             |
| <b>Tylectomy2</b>                   | 14                         | 14                      | 8        | 6          | 12       | 2     | 2                             |
| <b>IVitC + Tylectomy2</b>           | 1                          | 1                       | 0        | 1          | 1        | 0     | 0                             |
| <b>IVC + Tylectomy2</b>             | 2                          | 2                       | 1        | 1          | 1        | 1     | 0                             |
| <b>Tylectomy3</b>                   | 4                          | 4                       | 3        | 31         | 2        | 2     | 1                             |
| <b>TOTAL</b>                        | 76                         | 21                      | 25       | 57         | 43       | 9     | 7                             |

Cryo, cryotherapy; IAC, intra-arterial chemotherapy; IVitC, intravitreal chemotherapy; IVC, systemic chemotherapy

\*Two patients refused enucleation despite tumor growth
